# Supplementary material for: Inactivation of thermogenic UCP1 as a historical contingency in multiple placental mammal clades
Source: PubMed Central journal article supplement — Sci Adv. 2017 Jul 12;3(7):e1602878. doi: 10.1126/sciadv.1602878 (PMC5507634; doi:10.1126/sciadv.1602878), 2017-07-12
Supplement: 1602878_SM.pdf [file 1602878_SM.pdf]

## Supplementary Materials for **Inactivation of thermogenic UCP1 as a historical contingency in multiple placental mammal clades**

Michael J. Gaudry, Martin Jastroch, Jason R. Treberg, Michael Hofreiter, Johanna L. A. Paijmans, James Starrett, Nathan Wales, Anthony V. Signore, Mark S. Springer, Kevin L. Campbell

Published 12 July 2017, *Sci. Adv.* **3**, e1602878 (2017)  
DOI: 10.1126/sciadv.1602878

### The PDF file includes:

- fig. S1. Schematic maximum-likelihood tree of *ucp* sequences used in this study ( $n = 400$ ).
- fig. S2. Exon alignments depicting deleterious mutations found in *UCP1* sequences of placental mammal taxa.
- fig. S3. Ribbon diagram of residues 13 to 304 of human UCP1 (UniProt accession number P25874) structurally modeled by SWISS-MODEL.
- fig. S4. Amino acid alignment of vertebrate sln.
- table S1. GenBank accession numbers of species used in this study.
- table S2. Likelihood ratio tests for *ucp1* CODEML models.
- table S3. Calculated *ucp1* inactivation dates (Ma) within the placental mammal lineage.
- table S4. Results of BiSSE models with and without constraints on the diversification rate for five trees from the work of Faurby and Svenning (56).
- table S5. BiSSE results for neutral character simulations.
- table S6. Deleterious mutations found in *ucp2* and *ucp3* sequences of placental mammal taxa.
- table S7. Specimen data and sources of tissue samples used for PCR amplification and DNA hybridization capture.
- table S8. Fossil constraints used in timetree analysis.

### Other Supplementary Material for this manuscript includes the following:

(available at [advances.sciencemag.org/cgi/content/full/3/7/e1602878/DC1](http://advances.sciencemag.org/cgi/content/full/3/7/e1602878/DC1))

- data file S1. Gene partitions, a maximum likelihood phylogram, and mcmcree (text file).

- data file S2. *ucp1* free ratio model (text file).
- data file S3. Fossil body mass, taxon diversity, and UCP1 diversification codings (Excel file).
- data file S4. *ucp2* free ratio model (Text file).
- data file S5. *ucp3* free ratio model (Text file).
- data file S6. *ucp1* coding sequence alignment (Fasta file).
- data file S7. *ucp2* coding sequence alignment (Fasta file).
- data file S8. *ucp3* coding sequence alignment (Fasta file).
- data file S9. Accession numbers for the 41 loci used to construct the 51-kb maximum likelihood species tree (Fasta file).
- data file S10. A 51-kb alignment (41 genes) for 140 vertebrate species (Text file).

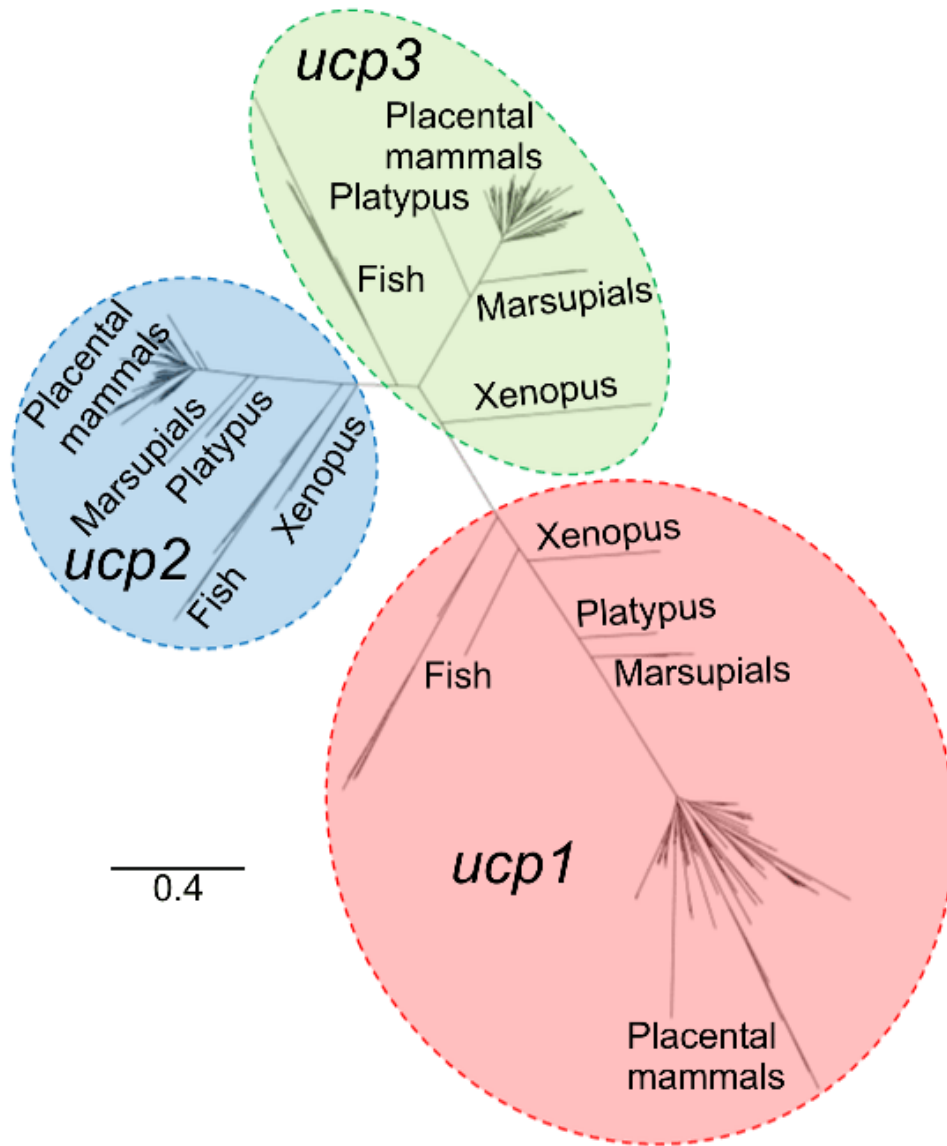

**fig. S1. Schematic maximum-likelihood tree of *ucp* sequences used in this study ( $n = 400$ ).**  
 Branch lengths denote number of substitutions per site.

Exon 1

1 10 20 30 40 50  
|...|...|...|...|...|...|...|...|...|...|...|  
*Homo sapiens* ATGGGGGGCCTGA-CAGCCTCGGACGTACACCCGACCC---TGGGGGTCC  
*Bradypus variegatus* ?????????????????????????????????????????????????  
*Choloepus hoffmanni* ?????????????????????????????????????????????????  
*Mylonodon darwini* ?????????????????????????????????????????????????  
*Cyclopes didactylus* ?????????????????????????????????????????????????  
*Dasybus novemcinctus* ATGGGGCGCCAGGCTCCCGCGGGCTCACCCCGCGC-----  
*Procvavia capensis* CTG--AGTTAAGA-CAACCTCAGAAATGCCGCCTAC-----GCA  
*Elephas maximus* ACGGTAGGCCAGA-CGACCGCAGACGTGCCCGGACCATGGTGGGGGTCA  
*Mammuthus primigenius* ACGGTAGGCCAGA-CGACCGCAGACGTGCCCGGACCATGGTGGGGGTCA  
*Loxodonta africana* ACCGTAGGCCAGA-CGACCGCAGACGTGCCCGGACCATGGTGGGGGTCA  
*Trichechus manatus* ATGGTGGGCCAGA-CTACCTGGGATGTGCCCCGACCA---TGGGCGTCA  
*Dugong dugon* ATGGTGGGCCAGA-CTACCTCGGATGTGCCCCGACCA---TGGGCGTCA  
*Hydrodamalis gigas* ATGGTGGGCCAGA-CTACCTCGGATGTGCCCCGACCA---TGGGCGTCA  
*Sus scrofa* CTGTCAGGA-TGA-CAGTTCCTGAAGTGCCCCGACCA---TAGCGGTCA  
*Sus verrucosus* CTGTCAGGA-TGA-CAGTTCCTGAAGTGCCCTCGACCA---TAGCGGTCA  
*Sus cebifrons* CTGTCAGGA-TGA-CAGTTCCTGAAGTGCCCTCGACCA---TAGCGGTCA  
*Physeter macrocephalus* ATGGTGGGACTCG-CAGCCTCATACTGCCCCGACCA---TGGGCGTCA  
*Delphinapterus leucas* -----  
*Lipotes vexillifer* ATGGTGGGACTCG-CAGCCTCAGACGTGCCCCGACCA---TGGGCGTCA  
*Balaena mysticetus* ATGGTGGCACTCA-CAGCCTCAGACGTGCCCCGACCA---TGGGCGTCA  
*Balaenoptera acutorostrata* ATGCTGGGACTCA-CAGCCTCAGACGCGCCCCGACCG---TGGGCGTCA  
*Balaenoptera physalus* ATGCTGGGACTCA-CAGCCTCAGACGCGCCCCGACCA---TGGGCGTCA  
*Balaenoptera bonaerensis* ATGCTGGGACTCA-CAGCCTCAGACGCGCCCCGACCA---TGGGCGTCA  
*Equus asinus* ATGGTGGGGCCCA-CAGCCTCGGACCCGCCCCGACCA---TGGGCGTCA  
*Equus quagga boehmi* ATGGTGGGGCCCA-CAGCCTCGGACCGCCCCGACCA---TGGGCGTCA  
*Equus przewalskii* ?????????????????????????????????????????????????  
*Equus caballus* ATGGTGGGGCCCA-CAGCCTCGGACGTGCCCCGACCA---TGGGCGTCA  
*Manis pentadactyla* -----

51 60 70 80 90 100  
|...|...|...|...|...|...|...|...|...|...|...|  
*Homo sapiens* AGCTCTTCTCAGCTGGA---ATAGCGGGCTGCTTGGCGGACGTGATCACC  
*Bradypus variegatus* ?????????????????????????????????????????????????  
*Choloepus hoffmanni* ?????????????????????????????????????????????????  
*Mylonodon darwini* ?????????????????????????????????????????????????  
*Cyclopes didactylus* ?????????????????????????????????????????????????  
*Dasybus novemcinctus* -----GCGGAAACGAGGCGGC-----GCGAGGTGCACCCCGC  
*Procvavia capensis* ACCTCTTCTCAGCTGGA---GTGGCGGCCTGCTTGGCCGGTGTGATCACC  
*Elephas maximus* AGATCTTCTCAGCGGA---GTGGCGGCCTGCTTGGCAGATGTAATTACC  
*Mammuthus primigenius* AGATCTTCTCAGCGGA---GTGGCGGCCTGCTTGGCAGATGTAATTACC  
*Loxodonta africana* AGATCTTCTCAGCGGA---GTGGCGGCCTGCTTGGCAGATGTAATTACC  
*Trichechus manatus* AGATCGTCTCAGCTGGA---GTGTGGCCCTGTTTGGCGGATGTGATCACC  
*Dugong dugon* AGATTGTCTCAGCTGGA---GTGTGGCCCTGTTTGGCGGATGTGATCACC  
*Hydrodamalis gigas* AGATTGTCTCAGCTGGA---GTGTGGCCCTGTTTGGCGGATGTGATCACC  
*Sus scrofa* AGATCTTCTCAGCTGGA---GCAGCGGCCTGCGTGGCAGATGTGATCACC  
*Sus verrucosus* AGATCTTCTCAGCTGGA---GCGGCGGCCTGCGTGGCAGATGTGATCACC  
*Sus cebifrons* AGATCTTCTCAGCTGGA---GCGGCGGCCTGCGTGGCAGATGTGATCACC  
*Physeter macrocephalus* AGATCTTCTCGGCTGGA---GTGGCGGCCTGCGTGGCGGATGTGATCACC  
*Delphinapterus leucas* -----  
*Lipotes vexillifer* AGATCTTCTCGGCTGGA---GTGGCGGCCAGCGTGGCGGATGTGATCACC  
*Balaena mysticetus* CGATCTTCTCGGCTGGA---GTGGCGGCCGCGTGGCGGATGTGATCACC  
*Balaenoptera acutorostrata* CGATCTTCTCGGCTGGA---GTGGCGGCCGCGTGGCGGATGTGATCACC  
*Balaenoptera physalus* CGATCTTCTCGGCTGGA---GTGGCGGCCGCGTGGCGGATGTGATCACC  
*Balaenoptera bonaerensis* CGATCTTCTCGGCTGGA---GTGGCGGCCGCGTGGCGGATGTGATCACC  
*Equus asinus* AGATCTTCTCGGCTGGA---GTGGCGGCCTGCGTGGCGGACGTGATCGCC  
*Equus quagga boehmi* AGATCTTCTCGGCTGGA---GTGGCGGCCTGCGTGGCGGACGTGATCGCC

*Equus przewalskii* ?????????????????????????????????????????CCTGCGTGGCGGACGTGATCGCC  
*Equus caballus* AGATCTTCTCGGCTGGA--GTGGCGGCCTGCGTGGCGGACGTGATCGCC  
*Manis pentadactyla* -----

|                                   | 101       | 110                             | 120                     | 130      |
|-----------------------------------|-----------|---------------------------------|-------------------------|----------|
|                                   | ...       | ....                            | ....                    | ....     |
| <i>Homo sapiens</i>               | TTCCCGC   | --TGGACACGGCCAAAGTCCGGCTCCAGgt  |                         |          |
| <i>Bradypus variegatus</i>        | ????????  | ????????                        | ????????                | ???????? |
| <i>Choloepus hoffmanni</i>        | ????????  | ????????                        | ????????                | ???????? |
| <i>Mylonodon darwini</i>          | ????????  | ????????                        | ????????                | ???????? |
| <i>Cyclopes didactylus</i>        | ????????  | ????????                        | ????????                | ???????? |
| <i>Dasyurus novemcinctus</i>      | CTCCTCCGC | TGGG                            | GCCGCCAGCCTGGGGCTGCAGct |          |
| <i>Procavia capensis</i>          | TTCCAC    | --TGGACACTGCCCAAGTTCGGGTACAGgc  |                         |          |
| <i>Elephas maximus</i>            | TTCCCGC   | --TGATCGCGGCCAAAGTTCGGCTGCAGat  |                         |          |
| <i>Mammuthus primigenius</i>      | TTCCCGC   | --TGGTCGCGGCCAAAGTTCGGCTGCAGat  |                         |          |
| <i>Loxodonta africana</i>         | TTCCCGC   | --TGGTCGCGGCCAAAGTTCGGCTGCAGat  |                         |          |
| <i>Trichechus manatus</i>         | TTCCAC    | --TGGACACGGCCAAGGTTTCGGCTACAGgt |                         |          |
| <i>Dugong dugon</i>               | TTCCAC    | --TGGACACGGCCAAGGTTTCGGCTACAGgt |                         |          |
| <i>Hydrodamalis gigas</i>         | TTCCAC    | --TGGACACGGCCAAGGTTTCGGCTACAGgt |                         |          |
| <i>Sus scrofa</i>                 | TTGCAC    | TTGGACACCGCCAAGTCCGGCTACAGgt    |                         |          |
| <i>Sus verrucosus</i>             | TTGCAC    | TTGGACACCGCCAAGTCCGGCTACAGgt    |                         |          |
| <i>Sus cebifrons</i>              | TTGCAC    | TTGGACACCGCCAAGTCCGGCTACAGgt    |                         |          |
| <i>Physeter macrocephalus</i>     | TTCCCGC   | --TGGACACGGCCAAGTCCGGCTACAGgg   |                         |          |
| <i>Delphinapterus leucas</i>      | -----     |                                 |                         |          |
| <i>Lipotes vexillifer</i>         | TTCCCGC   | --TGGACACGGCCAAGTCCGGCTACAGgg   |                         |          |
| <i>Balaena mysticetus</i>         | TTCCCGC   | --TGGACACGGCCAAGTCCGGCTACAGgt   |                         |          |
| <i>Balaenoptera acutorostrata</i> | TTCCCGC   | --TGGACACGGCCATAGTCCGGCTACAGgt  |                         |          |
| <i>Balaenoptera physalus</i>      | TTCCCGC   | --TGGACACGGCCAAGTCCGGCTACAGgt   |                         |          |
| <i>Balaenoptera bonaerensis</i>   | TTCCCGC   | --TGGACACGGCCATAGTCCGGCTACAGgt  |                         |          |
| <i>Equus asinus</i>               | TTCCCGC   | --TGGACACGGCCAAGTCCGGCTGCAGgt   |                         |          |
| <i>Equus quagga boehmi</i>        | TTCCCGC   | --TGGACACGGCCAAGTCCGGCTGCAGgt   |                         |          |
| <i>Equus przewalskii</i>          | TTCCCGC   | --TGGACACGGCCAAGTCCGGCTGCAGgt   |                         |          |
| <i>Equus caballus</i>             | TTCCCGC   | --TGGACACGGCCAAGTCCGGCTGCAGgt   |                         |          |
| <i>Manis pentadactyla</i>         | -----     |                                 |                         |          |

**Exon 2**

|                                   | 136                                                     | 140      | 150      | 160      | 170      | 180      |
|-----------------------------------|---------------------------------------------------------|----------|----------|----------|----------|----------|
|                                   | ...                                                     | ....     | ....     | ....     | ....     | ....     |
| <i>Homo sapiens</i>               | agGTCCAAGGTGAATGCCGACGTCCAGTGTTATTAGGTATAAAAGGTGTCCTG   |          |          |          |          |          |
| <i>Bradypus variegatus</i>        | ????????                                                | ???????? | ???????? | ???????? | ???????? | ???????? |
| <i>Choloepus hoffmanni</i>        | ????????                                                | ???????? | ???????? | ???????? | ???????? | ???????? |
| <i>Mylonodon darwini</i>          | ????????                                                | ???????? | ???????? | ???????? | ???????? | ???????? |
| <i>Cyclopes didactylus</i>        | ????????                                                | ???????? | ???????? | ???????? | ???????? | ???????? |
| <i>Dasyurus novemcinctus</i>      | agATCCAAGGTGAAGGTGAGAAATCCCATGCTATTAAGTACAAAGGTCTCCTG   |          |          |          |          |          |
| <i>Procavia capensis</i>          | agATCCAAGGTGAATGGCAGAACTCCAGTGCCCTTAGCTATAAAAGGCGTCTTG  |          |          |          |          |          |
| <i>Elephas maximus</i>            | agATCCAAGGTGAATGCCAGACCTCCAGTGCCATTAGGTATAAAAGGTGTCTTG  |          |          |          |          |          |
| <i>Mammuthus primigenius</i>      | agATCCAAGGTGAATGCCAGACCTCCAGTGCCATTAGGTATAAAAGGTGTCTTG  |          |          |          |          |          |
| <i>Loxodonta africana</i>         | agATCCAAGGTGAATGCCAGACCTCCAGTGCCATTAGGTATAAAAGGTGTCTTG  |          |          |          |          |          |
| <i>Trichechus manatus</i>         | agATCCAAGGTGAATGCCAGACCTCCAGTGCCATTAGGTATAAAAGGTGTCTTG  |          |          |          |          |          |
| <i>Dugong dugon</i>               | agATCCAAGGTGAATGCCAGACCTCCAGTGCCATTAGGTATAAAAGGTGTCTTG  |          |          |          |          |          |
| <i>Hydrodamalis gigas</i>         | agATCCAAGGTGAGTGCCAGACCTCCAGTGCCATTAGGTATAAAAGGTGTCTTG  |          |          |          |          |          |
| <i>Sus scrofa</i>                 | agATCCAAGGCAAATGCCGGTCTCCGGTACCATTTCGGTACAAAGACGTCTCTG  |          |          |          |          |          |
| <i>Sus verrucosus</i>             | agATCCAAGGCAAATGCCGGTCTCCGGTACCATTTCGGTACAAAGACGTCTCTG  |          |          |          |          |          |
| <i>Sus cebifrons</i>              | agATCCAAGGCAAATGCCGGTCTCCGGTACCATTTCGGTACAAAGACGTCTCTG  |          |          |          |          |          |
| <i>Physeter macrocephalus</i>     | agATCCAATGCGAATGCCAGACCTCCAGTGCTGTTAGGTATAAAAGGTGTCTCTG |          |          |          |          |          |
| <i>Delphinapterus leucas</i>      | -----                                                   |          |          |          |          |          |
| <i>Lipotes vexillifer</i>         | agATCCAATGCGAATGCCAGACCTCCAGTGCTGTTAGGTATAAAAGGTGTCTCTG |          |          |          |          |          |
| <i>Balaena mysticetus</i>         | agATCCAATGCGAATGCCAGATCTCCAGTGCTGTTAGGTATAAAAGGTGTCTCTG |          |          |          |          |          |
| <i>Balaenoptera acutorostrata</i> | agGTCCAATGCGAATGCCAGACCTCCAGTGCTGTTAGGTATAAAAGGTGTCTCTG |          |          |          |          |          |

*Balaenoptera physalus*  
*Balaenoptera bonaerensis*  
*Equus asinus*  
*Equus quagga boehmi*  
*Equus przewalskii*  
*Equus caballus*  
*Manis pentadactyla*

agATCCAATGCGAATGCCAGACCTCCAGTGCTGTTAGGTATAAAAAGTGTCTG  
agATCCAATGCGAATGCCAGACCTCCAGTGCTGTTAGGTATAAAAAGTGTCTG  
agATCCAAGGCGAGCGCCAGACCTCCAGTGCCCTGAGGTATAACGGTATCCTG  
agATCCAAGGCGAGCGCCAGACCTCCAGTGCCCTGAGGTATAACGGTATCCTG  
agATCCAAGGCGAGCGCCAGACCTCCAGTGCCCTGAGGTATAAAAAGTGTCTG  
agATCCAAGGCGAGCGCCAGACCTCCAGTGCCCTGAGGTATAAAAAGTGTCTG  
-----

*Homo sapiens*  
*Bradypus variegatus*  
*Choloepus hoffmanni*  
*Mylodon darwinii*  
*Cyclopes didactylus*  
*Dasyopus novemcinctus*  
*Procapra capensis*  
*Elephas maximus*  
*Mammuthus primigenius*  
*Loxodonta africana*  
*Trichechus manatus*  
*Dugong dugon*  
*Hydrodamalis gigas*  
*Sus scrofa*  
*Sus verrucosus*  
*Sus cebifrons*  
*Physeter microcephalus*  
*Delphinapterus leucas*  
*Lipotes vexillifer*  
*Balaena mysticetus*  
*Balaenoptera acutorostrata*  
*Balaenoptera physalus*  
*Balaenoptera bonaerensis*  
*Equus asinus*  
*Equus quagga boehmi*  
*Equus przewalskii*  
*Equus caballus*  
*Manis pentadactyla*

186 190 200 210 220 230  
|...|...|...|...|...|...|...|...|...|...|...|...|  
GGAACAATCACCCTGTGTTAAAAACAGAAGGGCGGATGAAACTCTACAG  
????????????????????????????????????????????????????  
????????????????????????????????????????????????????  
????????????????????????????????????????????????????  
????????????????????????????????????????????????????  
GGAACAGTCGCCACTTGGCAAAAACGGAAGGGCCAATGAA--CCTACCG  
GAAACAACCACCCTTGACAAAAACAGAGGGGCAATGAAACTATAGCT  
GGAACAATCACTACTCTGGCAAAAAGGAAGAGCCAATGAAACTCTATAG  
GGAACAATCACTACTCTGGCAAAAAGGAAGAGCCAATGAAACTCTATAG  
GGAACAATCACCCTCTGGCAAAAACAGAAGGGCCAATGAAACGCTATAG  
GGAACAATCACCCTCTGGCAAAAACAGAAGGGCCAATGAAACGCTATAG  
GGAACAATCACCCTCTGGCAAAAACAGAAGGGCCAATGAAACGCTATAG  
GGAACAATCACCCTCTGGCAAAAACAGAAGGGCCAATGAAAGCTCTACAG  
GGAACAATCACTACTCTGGCAAAAACAGAAGGGCCAATGAAAGCTCTACAG  
GGAACAATCACCCTCTGGCAAAAACAGAAGGGCCAATGAAACTCTACAG  
-----  
GGAACAATCACCCTCTGGCAAAAACAGAAGGGCCAATGAAACGCTCCAG  
GGAACAATCACCCTCTGGCAAAAACAGAAGGGCCAATGAAACTCTACAG  
GGAACAATCACCCTCTGGCAAAAACAGAAGGGCCAATGAAACTCTACAA  
GGAACAATCACCCTCTGGCAAAAACAGAAGGGCCAATGAAACTCTACAG  
GGGACAATCACCCTCTGGCAAAAACAGAAGGGCCAATGAAACTCTACAG  
GGGACAATCACCCTCTGGCAAAAACAGAAGGGCCAATGAAACTCTACAG  
GGGACAATCACCCTCTGGCAAAAACAGAAGGGCCAATGAAACTCTACAG  
-----

*Homo sapiens*  
*Bradypus variegatus*  
*Choloepus hoffmanni*  
*Mylodon darwinii*  
*Cyclopes didactylus*  
*Dasyopus novemcinctus*  
*Procapra capensis*  
*Elephas maximus*  
*Mammuthus primigenius*  
*Loxodonta africana*  
*Trichechus manatus*  
*Dugong dugon*  
*Hydrodamalis gigas*  
*Sus scrofa*  
*Sus verrucosus*  
*Sus cebifrons*  
*Physeter microcephalus*  
*Delphinapterus leucas*  
*Lipotes vexillifer*

236 240 250 260 270 280  
|...|...|...|...|...|...|...|...|...|...|...|...|  
CGGGCTGCCTGCGGGGCTTCAGCGGCAATCAGCTCCGCCCTCTCTCAGGA  
????????????????????????????????????????????????????  
????????????????????????????????????????????????????  
????????????????????????????????????????????????????  
CGAGCTGCCTGCTGGCTTCAGAAACAGATGCACTCCACCCT--AGGA  
--GCTGCCTGCTGGCTTCAGAGACAAATAAGCTTTGCCTCTCTTAGAA  
TGGGCTGCCTGCTGGCTTCAGAGACAAATAAGCTTTGCCTCTCTTAGGA  
TGGGCTGCCTGCTGGCTTCAGAGACAAATAAGCTTTGCCTCTCTTAGGA  
TGGGCTGCCTGCTGGCTTCAGAGACAAATAAGCTTTGCCTCTCTTAGGA  
TGGGCTGCCTGCTGGCTTCAGAGACAAATAAGCTTTGCCTCTCTTAGGA  
TGGTCTGCCTGCTGGCTTCAGAGACAGATAAGCTTTGCCTCTCTTAGGA  
AGGGCTGCCTGCTGGCTTCAGAGACAAATAAAGCTTACCTCTCTTAGGA  
AGGGCTGCCTGCTGGCTTCAGAGACAAATAAAGCTTACCTCTCTTAGGA  
AGGGCTGCCTGCTGGCTTCAGAGACAAATAAAGCTTACCTCTCTTAGGA  
GGGGCTGTCTGCTGGCTTCAGAGACAAATAAGCTTTGCCTCTCTTAGGA  
-----  
TGGGCTGCCTGCTGGCTTCAGAGACAAATAAGCTTCTGCCTCTCTTAGGA

*Balaena mysticetus*  
*Balaenoptera acutorostrata*  
*Balaenoptera physalus*  
*Balaenoptera bonaerensis*  
*Equus asinus*  
*Equus quagga boehmi*  
*Equus przewalskii*  
*Equus caballus*  
*Manis pentadactyla*

CGGGCTGCCTGCTGGCCTCCAGAGACAAATAAGCTTTGCCTCTCTTAGGA  
CGGGCTGCCTGCTGGCCCCAGAGACAAATAAGCTTTGCCTCTCTTAGGA  
TGGGCTGCCAGCTGGCCTCCAGAGACAAATAAGCTTTGCTTCTCTTAGGA  
CGGGCTGCCTGCTGGCCTCCAGAGACAAATAAGCTTTGCCTCTCTTAGGA  
CGGGCTGCCTGCTGGCCTCCAGAGA TAAATAAGCTTCGCCTCTCTGAGGA  
CGGGCTGCCTGCTGGCCTCCAGAGA TAAATAAGCTTCGCCTCTCTGAGGA  
CGGGCCGCTGCTGGCCTCCAGAGA TAAATAAGCTTCGCCTCTCTGAGGA  
CGGGCCGCTGCTGGCCTCCAGAGA TAAATAAGCTTCGCCTCTCTGAGGA  
-----

286 290 300 310 320 330  
|...|...|...|...|...|...|...|...|...|...|...  
*Homo sapiens* TCGGCCTCTACGACACGGTCCAGGAGTTCCCTCACCGCAGGGAAAGAAAgT  
*Bradypus variegatus* ?????????????????????????????????????????????????  
*Choloepus hoffmanni* ?????????????????????????????????????????????????  
*Mylodon darwinii* ?????????????????????????????????????????????????  
*Cyclopes didactylus* ?????????????????????????????????????????????????  
*Dasyus novemcinctus* TGGGACTC TACGATACCGTCCCGCGGC TTTCCACCGCAGGGAAACCAGca  
*Procavia capensis* TTGGCTTCTGTGACA GGTTCAGGAGTACTTCACTGGAGGAAAGAAAgT  
*Elephas maximus* CTGGCCTCTATGATATGGCCAGGAGTATTCCACTGCAGAGAAAGAAAgT  
*Mammuthus primigenius* CTGGCCTCTATGATATGGCCAGGAGTATTCCACTGCAGAGAAAGAAAgT  
*Loxodonta africana* CTGGCCTCTATGATATGGCCAGGAGTATTCCACTGCAGAGAAAGAAAgT  
*Trichechus manatus* TTGGCCTCTATGATACTGTCCAGGAGTATTTCACTGCAGGGAAAGAAAgT  
*Dugong dugon* TTGGCCTCTATGATACTGTCCAGGAGTACTTCACTGCAGGG TAAAGAAAgT  
*Hydrodamalis gigas* TTGGCCTCTATGATACTGTA?AGGAGTACTTCACTGCAGGG TAAAGAAAgT  
*Sus scrofa* TCAGCCTCTATGATAACCATCCAGG -----GAGAGAAAgT  
*Sus verrucosus* TCACCCTCTATGATAACCATCCAGG -----GAGAGAAAgT  
*Sus cebifrons* TCAGCCTCTATGATAACCATCCAGG -----GAGAGAAAgT  
*Physeter macrocephalus* TCAGCCTCTATGAGAGCATCCAGGAGCTCTTACCACAGGGAAAGAAAgT  
*Delphinapterus leucas* -----  
*Lipotes vexillifer* TCAGCCTCTATGAGAGCAT CAGGAGTTCTTACCACAGGGAAAGAAAgT  
*Balaena mysticetus* TCAGCATCTATGAAAGCATCCAGGAGTTCTTACCACAGGGAAAGAAAgT  
*Balaenoptera acutorostrata* TCAGCCTCTATGAAAGCATCCAGGAGTTCTTACCACAGGGAAAGAAAgT  
*Balaenoptera physalus* TCAGCCTCTATGAAAGCATCCAGGAGTTCTTACCACAGGGAAAGAAAgT  
*Balaenoptera bonaerensis* TCAGCCTCTATGAAAGCATCCAGGAGTTCTTACCACAGGGAAAGAAAgT  
*Equus asinus* TTGGCCTCTATGATACGGTCCAGGAGTTCTTACCACAGGGAAAGAAAgT  
*Equus quagga boehmi* TTGGCCTCTATGATACGGTCCAGGAGTTCTTACCACAGGGAAAGAAAgT  
*Equus przewalskii* TTGGCCTCTATGATACGGTCCAGGAGTTCTTACCACAGGGAAAGAAAgT  
*Equus caballus* TTGGCCTCTATGATACGGTCCAGGAGTTCTTACCACAGGGAAAGAAAgT  
*Manis pentadactyla* -----

### Exon 3

*Homo sapiens*  
*Bradypus variegatus*  
*Choloepus hoffmanni*  
*Mylodon darwinii*  
*Cyclopes didactylus*  
*Dasyus novemcinctus*  
*Procavia capensis*  
*Elephas maximus*  
*Mammuthus primigenius*  
*Loxodonta africana*  
*Trichechus manatus*  
*Dugong dugon*  
*Hydrodamalis gigas*  
*Sus scrofa*  
*Sus verrucosus*

334 340 350 360 370 380  
|.....|...|...|...|...|...|...|...|...|...|...|  
agCAGCACCTAGTTTAGGAAGCAAGATTTTAGCTGGTCTAACGACTGGAGGAGT  
????????????????????????????????????????????????  
????????????????????????????????????????????????  
ag-----GTAGTTTAGAAATCAAGATTTTTCAGTTGGCTTAACAAGTGGAGAAGT  
????????????????????????????????????????????????  
-----  
aaCTCCAGCTAGTTTAGAAAGCAAGATCGCTGCTGGCTTAAGGACTGGAGGAGT  
aaCTCCAGCTAGTTTAGAAAGCAAGATCGCTGCTGGCTTAAGGACTGGAGGAGT  
aaCTCCAGCTAGTTTAGAAAGCAAGATCGCTGCTGGCTTAAGGACTGGAGGAGT  
agCACCGGCTAGTTTAGGAAGCAAGATCTCTGCTGGCTTAACGACTGGAGGAGT  
agCACCGGCTAGTTTAGGAAGCAAGATCTCCGCTGGCTTAACGACTGGAGGAGT  
agCACCGGCTAGTTTAGGAAGCAAGATCTCCGCTGGCTTAATGACTGGAGGAGT  
-----







*Mammuthus primigenius* agGGACTACTCTCAGTCTGACAAGAAATATCATCATCAGTTGTACAGAGCTAG  
*Loxodonta africana* agGGACTACTCTCAATCTGACAAGAAATATCATCATCAGTTGTACAGAGCTAG  
*Trichechus manatus* agGGATTACTCCCAATCTGACAAGAAATGTCATCATCAATTTGTACAGAGCTAG  
*Dugong dugon* agGGACTACTCCCAATCTGACAAGAAATGTCATCATCAATTTGTACAGAGCTAG  
*Hydrodamalis gigas* agGGACTACTCCCAATCTGACAAGAAATGTCATCATCAATTTGTACAGAGCTAG  
*Sus scrofa* -----  
*Sus verrucosus* -----  
*Sus cebifrons* -----  
*Physeter macrocephalus* agGTTTCTACTCCAAATCTGACAAGAATTGTCATCATCGGCTGTACAGAGCTAG  
*Delphinapterus leucas* tcACTTTTATATAGTGCCTCAGCAATTTACTACCGATTTGCTTTCTAGTATGTC  
*Lipotes vexillifer* agGTTTCTACTCCAAATCTGACAAGAATTGTCATCATCAGCTGTACAGAGCTAG  
*Balaena mysticetus* agGTTTCTACTCCGAATCTGACAAGAATTGTCATCATCAGCTGTACAGAGCTAG  
*Balaenoptera acutorostrata* agGTTTCTACTCCGAATCTGACAAGAATTGTCATCATCAGCTGTACAGAGCTAG  
*Balaenoptera physalus* agGTTTCTACTCCGAATCTGACAAGAATTGTCATCATCAGCTGTACAGAGCTAG  
*Balaenoptera bonaerensis* agGTTTCTACTCCGAATCTGACAAGAATTGTCATCATCAGCTGTATAGAGCTAG  
*Equus asinus* agGGACCACTCTCAATCTGACAAGAAATGTCATCATCAATTTGTACAGAGCTAG  
*Equus quagga boehmi* agGGACCACTCTCAATCTGACAAGAAATGTCATCATCAATTTGTACAGAGCTAG  
*Equus przewalskii* agGGACCACTCTCAATCTGACAAGAAATGTCATCATCAATTTGTACAGAGCTAG  
*Equus caballus* agGGACCACTCTCAATCTGACAAGAAATGTCATCATCAATTTGTACAGAGCTAG  
*Manis pentadactyla* atGGTCTACTCCCAATCTGATGAGAAATGTCATCATGAATTTGTGCAGAGCTAG

586 590 600 610 620 630  
 |...|...|...|...|...|...|...|...|...|...|  
 TAACATATGATCTAATGAAGGAGGCCTTTGTGAAAAACAACATATTAGCAGgt  
 ?????????????????????????????????????????????????????????  
 ?????????????????????????????????????????????????????????  
 ?????????????????????????????????????????????????????????  
 ?????????????????????????????????????????????????????????

*Homo sapiens* TAACATATGATCTAATGAAGGAGGCCTTTGTGAAAAACAACATATTAGCAGgt  
*Bradypus variegatus* ?????????????????????????????????????????????????????????  
*Choloepus hoffmanni* ?????????????????????????????????????????????????????????  
*Mylodon darwini* ?????????????????????????????????????????????????????????  
*Cyclopes didactylus* ?????????????????????????????????????????????????????????  
*Dasypus novemcinctus* -----  
*Procavia capensis* -----  
*Elephas maximus* TAACATATGACCTGATGAAGGAGACCTTTGTGAAAAACAACCTACTAGCAGct  
*Mammuthus primigenius* TAACATATGACCTGATGAAGGAGACCTTTGTGAAAAACAACCTACTAGCAGct  
*Loxodonta africana* TAACATATGACCTGATGAAGGAGACCTTTGTGAAAAACAACCTACTAGCAGct  
*Trichechus manatus* TAACACATGACCTAATGAAGGAGACCTTTGTGAAAAACAATCTACTGGCAGgt  
*Dugong dugon* TAACACATGACCTAATGAAGGAGACCTTTGTGAAAAACAATCTACTGGCAGgt  
*Hydrodamalis gigas* TAACACATGACCTAATGAAGGAGACCTTTGTGAAAAACAATCTACTGGCAGat  
*Sus scrofa* -----  
*Sus verrucosus* -----  
*Sus cebifrons* -----  
*Physeter macrocephalus* TAACATATGACCTAATGAAGGAGGCCTTTGTGAAAAACAATTAACAGgt  
*Delphinapterus leucas* ACTATCTCATTGACATGCTCCTGCCCTTTGTGAAAAACAATTAACAGgt  
*Lipotes vexillifer* TAACATATGACCTAATGAAGGAGACCTTTGTGAAAAACAATTAACAGgt  
*Balaena mysticetus* TAACGTATGACCTAATGAAGGAGACCTTTGTGAAAAACAATTAACAGgt  
*Balaenoptera acutorostrata* TAACGTATGACCTAATGAAGGAGGCCTTTGTGAAAAACAATTAACAGgt  
*Balaenoptera physalus* TAACGTATGTCCTAATGAAGGAGGCCTTTGTGAAAAACAATTAACAGgt  
*Balaenoptera bonaerensis* TAACGTATGACCTAATGAAGGAGGCCTTTGTGAAAAACAATTAACAGgt  
*Equus asinus* TAACCCATGACCTAATGAAGGAGGCCTTTGTGAAAAACCAACTATTAGCAGgt  
*Equus quagga boehmi* TAACCCATGACCTAATGAAGGAGGCCTTTGTGAAAAACCAACTATTAGCAGgt  
*Equus przewalskii* TAACCCATGACCTAATGAAGGAGGCCTTTGTGAAAAACCAACTATTAGCAGgt  
*Equus caballus* TAACCCATGACCTAATGAAGGAGGCCTTTGTGAAAAACCAACTATTAGCAGgt  
*Manis pentadactyla* TAA-GTATGACCTAATGAAGGAGGCACCTCTAAACAAGA-CTTACCAGct

Exon 5

636 640 650 660 670 680  
 |...|...|...|...|...|...|...|...|...|...|  
*Homo sapiens* agATGACGTCCCCTGCCACTTGGTGTGGCTCTTATCGCTGGATTTTGC---



|                                   |                                                          |
|-----------------------------------|----------------------------------------------------------|
|                                   | ... ... ... ... ... ... ... ... ... ... ...              |
| <i>Homo sapiens</i>               | ATTCTCCACCAGGACAG---TACAAAAGTGTGCCCAACTGTGCAATGAAA       |
| <i>Bradypus variegatus</i>        | ???????????????????????????????????????????????????????? |
| <i>Choloepus hoffmanni</i>        | ???????????????????????????????????????????????????????? |
| <i>Mylodon darwinii</i>           | ???????????????????????????????????????????????????????? |
| <i>Cyclopes didactylus</i>        | ???????????????????????????????????????????????????????? |
| <i>Dasypus novemcinctus</i>       | -----                                                    |
| <i>Procavia capensis</i>          | ATTCTCCACCAAGATAC---TAAACTAGTGTACCCAAACATGCAACCATC       |
| <i>Elephas maximus</i>            | ATTCTCCACCAGGATAC---TACACGAGTGTACCCAAATGCGCAGTGACC       |
| <i>Mammuthus primigenius</i>      | ATTCTCCACCAGGATAC---TACACGAGTGTACCCAAATGCGCAGTGACC       |
| <i>Loxodonta africana</i>         | ATTCTCCACCAGGATAC---TACACGAGTGTACCCAAATGCGCAGTGACC       |
| <i>Trichechus manatus</i>         | ATTCTCCACCAGGATAC---TACACAAGCATACCCAAATGTGCAATGACC       |
| <i>Dugong dugon</i>               | ATTCTCCACCAGGATAC---TACACAAGCATGCCCCAAATGTGCAATGACC      |
| <i>Hydrodamalis gigas</i>         | ATTCTCCACCAGGATAC---TACACAAGCATACCCAAATGTGCAATGACC       |
| <i>Sus scrofa</i>                 | -----                                                    |
| <i>Sus verrucosus</i>             | -----                                                    |
| <i>Sus cebifrons</i>              | -----                                                    |
| <i>Physeter microcephalus</i>     | ACTGTCTACCGGGACAG---TACACAAGTGTGTCCAACCTGTGCAATGATG      |
| <i>Delphinapterus leucas</i>      | ACTGTCTACCGGGACAG---TACACAAGTGTGTCCAACCTGTGCAATGATG      |
| <i>Lipotes vexillifer</i>         | ACTGTCTACCGAGACAG---TACATAAGCGTGTCCAACCTGTGCAATGATG      |
| <i>Balaena mysticetus</i>         | ACTGTCTACCGGGACGGACACACAAGTGTGTCCGACTGCGCAATGATG         |
| <i>Balaenoptera acutorostrata</i> | ACTGTCTACCGGGACGG---TACACAAGTGTGTCCGACTGCGCAATGTTG       |
| <i>Balaenoptera physalus</i>      | ACTGTCTACCRGGACGG---TACACAAGTGTGTCCGACTGCGCAATGTTG       |
| <i>Balaenoptera bonaerensis</i>   | ACTGTCTACCGGGACGG---TACACAAGTGTGTCCGACTGCGCAATGTTG       |
| <i>Equus asinus</i>               | ATTCTCCACCAGGACAG---TACACAAGTGTGCCCAACTGTGCAACGACA       |
| <i>Equus quagga boehmi</i>        | ATTCTCCACCAGGACAG---TACACAAGTGTGCCCAACTGTGCAACGACA       |
| <i>Equus przewalskii</i>          | ATTCTCCACCAGGACAG---TACACAAGTGTGCCCAACTGTGCAACGACA       |
| <i>Equus caballus</i>             | ATTCTCCACCAGGACAG---TACACAAGTGTGCCCAACTGTGCAACGACA       |
| <i>Manis pentadactyla</i>         | ATTCTCTACCAGGACAA---TGCACAAGTGTGCCCACTGTGCAATGACA        |

786 790                    800                    810                    820

|                                   |                                                          |
|-----------------------------------|----------------------------------------------------------|
|                                   | ... ... ... ... ... ... ... ... ...                      |
| <i>Homo sapiens</i>               | GTGTTCACTAACGAAGGACCAACGGC-TTTCTTCAAGGggt                |
| <i>Bradypus variegatus</i>        | ???????????????????????????????????????????????????????? |
| <i>Choloepus hoffmanni</i>        | ???????????????????????????????????????????????????????? |
| <i>Mylodon darwinii</i>           | ???????????????????????????????????????????????????????? |
| <i>Cyclopes didactylus</i>        | ???????????????????????????????????????????????????????? |
| <i>Dasypus novemcinctus</i>       | -----                                                    |
| <i>Procavia capensis</i>          | ATGTTTACCAAGAAAAGACCACCAGC-TTTTTTCAAAGGgt                |
| <i>Elephas maximus</i>            | ATGTTTACCAAGAAAAGGACTGCCGGC-TTTTTTCAAAGGgt               |
| <i>Mammuthus primigenius</i>      | ATGTTTACCAAGAAAAGGACTGCCGGC-TTTTTTCAAAGGgt               |
| <i>Loxodonta africana</i>         | ATGTTTACCAAGAAAAGGACTGCCGGC-TTTTTTCAAAGGgt               |
| <i>Trichechus manatus</i>         | GTGTTTACCAAGGAAGGACTGCCGGC-TTTTTTCAAAGGgt                |
| <i>Dugong dugon</i>               | GCGTTTACCAAGGAAGGACTGCCGGC-TTTTTTCAAAGGgt                |
| <i>Hydrodamalis gigas</i>         | GTGTTTACCAAGGAAGGACTGCCGGC-TTTTTTCAAAGGgt                |
| <i>Sus scrofa</i>                 | -----                                                    |
| <i>Sus verrucosus</i>             | -----                                                    |
| <i>Sus cebifrons</i>              | -----                                                    |
| <i>Physeter microcephalus</i>     | GTCCTTCTAAGGAAGGACCATCGGC-TTTTTTCAAAGGgt                 |
| <i>Delphinapterus leucas</i>      | ATGCCCCTAAGGAAGGACCATCGGC-TTTTTTCAAAGGgt                 |
| <i>Lipotes vexillifer</i>         | ATGCTCACTAAGGAAGGACCATCGGC-TTTTTTCAAAGGgt                |
| <i>Balaena mysticetus</i>         | ATGCTCACTAAGGAAGGACCATCGGC-TTTTTTCAAAGGgt                |
| <i>Balaenoptera acutorostrata</i> | ATGCTCACTAAGGAAGGACCATCGGC-TTTTTTCAAAGGgt                |
| <i>Balaenoptera physalus</i>      | ATGCTCACTAAGGAAGGACCATCGGC-TTTTTTCAAAGGgt                |
| <i>Balaenoptera bonaerensis</i>   | ATGCTCACTAAGGAAGGACCATCGGC-TTCTTTCAAAGGgt                |
| <i>Equus asinus</i>               | ATGCTCACTAAGGAAGGACCGTCAGC-TTTTTTCAAAGGgt                |
| <i>Equus quagga boehmi</i>        | ATGCTCACTAAGGAAGGACCGTCAGC-TTTTTTCAAAGGgt                |
| <i>Equus przewalskii</i>          | ATGCTCACTAAGGAAGGACCGTCAGC-TTTTTTCAAAGGgt                |
| <i>Equus caballus</i>             | ATGCTCACTAAGGAAGGACCGTCAGC-TTTTTTCAAAGGgt                |
| <i>Manis pentadactyla</i>         | GTGCTCACTAAGGAAGGACCATCGGC-TTTTTTCAAAGGgc                |

Exon 6

825 830 840 850 860 870  
|. . .|. . .|. . .|. . .|. . .|. . .|. . .|. . .|. . .|. . .|  
*Homo sapiens* agGTTGGTACCTTCCTTCTTGCGACTTGGATCCTGGAACGTCATTATGTTTGT  
*Bradypus variegatus* agGTTTGTGCCTTCCTTCTTGCGACTTAGATCCTGGAATGTCATCATGTTTGA  
*Choloepus hoffmanni* agGTTTGTGCCTTCCTTCTTGAGACTTGGATCC**TGA**AATGTCATCATGTTTGT  
*Mylodon darwinii* ?????????????????????????????????????????????????????????  
*Cyclopes didactylus* agATTTGTACCTTCCTTCTTGCAACTAGGATCCTGGAATGTCATCATGTTTGT  
*Dasypus novemcinctus* agTCTTATGCCTTCCTTCTTG**TGA**CTCAGATCCTGGAATGTTGTCATGTTTGT  
*Procavia capensis* agGTTTGTACCTTCCTTCTTG**TGA**CTAAGACTGGAAGCATCATTAAGTTCAT  
*Elephas maximus* agGCTTGTGCCTTCCTTCTTGCGACTGGGATCCTGGAACGCCATTATGTTTTT  
*Mammuthus primigenius* agGCTTGTGCCTTCCTTCTTGCGACTGGGATCCTGGAACGCCATTATGTTTTT  
*Loxodonta africana* agGCTTGTGCCTTCCTTCTTGCGACTGGGATCCTGGAACGCCATTATGTTTTT  
*Trichechus manatus* agGTTTGTGCCTTCCTTCTTGCGACTCGGTTCCCTGGAATGTCATTATGTT---T  
*Dugong dugon* agGTTTGTGCCTTCCTTCTTG**TGA**CTCGGATCCTGGAATGTCATTATGTT---T  
*Hydrodamalis gigas* agGTTTGTGCCTTCCTTCTTGCGACTCGGATCCTGGAATGTCATTATGTT---T  
*Sus scrofa* agATTTGTACCTTCCTTCTGG**TGA**CTGGGATCCTGGAACGTCATCCCATTGT  
*Sus verrucosus* agATTTGTACCTTCCTTCTGG**TGA**CTGGGATCCTGGAACGTCATCCCATTGT  
*Sus cebifrons* agATTTGTACCTTCCTTCTGG**TGA**CTGGGATCCTGGAACGTCATCCCATTGT  
*Physeter microcephalus* agATTTGTACCTTCCTTCT**TGAGTGA**CTGGGATCCTGGAACATCATCGTGT---GT  
*Delphinapterus leucas* agATTTGTACCTTCCTTCTTG**TGA**CTGGGGTCTGGAACATCATCGTGT---GT  
*Lipotes vexillifer* agATTTGTACCTTCCTTCTTG**TGA**CTGGGATCCTGGAACATCATCGTGT---GT  
*Balaena mysticetus* agATTTGTACCTTCCTTCTTG**TGA**CTGGGATCCTGGAACATCATCGTGT---GT  
*Balaenoptera acutorostrata* agATTTGTACCTTCCTTCTTG**TGA**CTGGGATCCTGGAACATCATCGTGT---GT  
*Balaenoptera physalus* agATTTGTACCTTCCTTCTTG**TGA**CTGGGATCCTGGAACATCATCGTGT---GT  
*Balaenoptera bonaerensis* ?????????????????????????????????????????????????????????  
*Equus asinus* agATTTGTGCCTTCCTTCTTGCGACTCGGATCCTGGCATGTCATCATGTTTGT  
*Equus quagga boehmi* agATTTGTGCCTTCCTTCTTGCGACTCGGATCCTGGCATGTCATCATGTTTGT  
*Equus przewalskii* agATTTGTGCCTTCCTTCTTGCGACTCGGATCCTGGCATGTCATCATGTTTGT  
*Equus caballus* agATTTGTGCCTTCCTTCTTGCGACTCGGATCCTGGCATGTCATCATGTTTGT  
*Manis pentadactyla* agATTTG----TCCCTTCTTGACCTTGGGTCTCCAGACGTCATTATATTTGT

876 880 890 900 910 920  
|. . .|. . .|. . .|. . .|. . .|. . .|. . .|. . .|. . .|. . .|  
*Homo sapiens* GTGCTTTGAACAACCTGAAACGAGAAGTGTCAAAGTCAAGGCAGACTATGGA  
*Bradypus variegatus* GTA---CTGAACAGCTAAAACAGGAAAGGATGACATCAAGGCGGACTATGGA  
*Choloepus hoffmanni* GTG---TTGAACAGCTAAAACAGGAAATGATGACATCAAGGCA---ACTATGAA  
*Mylodon darwinii* ?????????????????????????????????????????????????????????  
*Cyclopes didactylus* GTG---TTGAACAGCTAAAACAAGAAGTGTGATGACATCAAGGCAGACTATGGA  
*Dasypus novemcinctus* GTACTTTGAACAGCTGAAAACAAGAATTGATGAAGCCAAGGCAGACTATGGA  
*Procavia capensis* GTGCTTTGAACAGCTGAAAAAAGAATTGATGAAGTCGAGGCAGATGATGGA  
*Elephas maximus* GTGCTCTGAACAGCTGAAAACAAGAATTGATGAAGTCAAGGCAGACTATGGG  
*Mammuthus primigenius* GTGCTCTGAACAGCTGAAAACAAGAATTGATGAAGTCAAGGCAGACTATGGG  
*Loxodonta africana* GTGCTCTGAACAGCTGAAAACAAGAATTGATGAAGTCAAGGCAGACTATGGG  
*Trichechus manatus* GTGCTTTGAA**TAG**CTGAAACGAGAATTGATGAAGTCGAGGGAGACTATGGA  
*Dugong dugon* GTGCTTTGAACAGCTGAAACGAGAATTGATGAAGTCGAGGCAGACTATGGA  
*Hydrodamalis gigas* GTGCTTTGAACAGCTGAAACGAGAATTGATGAAGTCGAGGCAGACTATGGA  
*Sus scrofa* GTGCTTTGAACAGCTGAAACAAGAGTTGATGGAGTCACGGCAGACTGTGGA  
*Sus verrucosus* GTGCTTTGAACAGCTGAAACAAGAGTTGATGGAGTCACGGCAGACTGTGGA  
*Sus cebifrons* GTGCTTTGAACAGCTGAAACAAGAGTTGATGGAGTCACGGCAGACTGTGGA  
*Physeter microcephalus* GTGCCTTGAACAGCTGAAGCGAGAAGTCTGAAGTCGAGGCAGACCATGGA  
*Delphinapterus leucas* GTGCTTTGAACAGCTGAAGCGAGAATTGATGAAGTTGAGGCAGACCATGGA  
*Lipotes vexillifer* GTGCTTTGAACAGCTGAAG**TGA**GAATTGATGAAGTTGAGGCAGACCATGGA  
*Balaena mysticetus* GTGCTTTGAACAGCTGAAGCGAGAATTGATGAAGTCGAGGCAGACCATGGA  
*Balaenoptera acutorostrata* GTGCTCTGAACAGCTGCAGCGAGAATTGATGAAGTCGAGGCAGACCATGGA  
*Balaenoptera physalus* GTGCTTTGAACAGCTGAAGMGAGAATTGATGAAGTCGAGGCAGACCATGGA  
*Balaenoptera bonaerensis* ?????????????????????????????????????????????????????????  
*Equus asinus* GTGCTTTGAACAGCTGAAGCGAGAATTGATGAAGTCAAGGCAGACCATGGA

|                                   |                                                                |
|-----------------------------------|----------------------------------------------------------------|
| <i>Equus quagga boehmi</i>        | GTGCTTTGAACAGCTGAAGCGAGAATTGATGAAGTCAACGCAGACCATGGA            |
| <i>Equus przewalskii</i>          | GTGCTTTGAACAGCTGAAGCGAGAATTGATGAAGTCAACGCAGACCATGGA            |
| <i>Equus caballus</i>             | GTGCTTTGAACAGCTGAAGCGAGAATTGATGAAGTCAACGTGACAGACCAT            |
| <i>Manis pentadactyla</i>         | GTGCTCTGAACAAGGAAAA <b>TGA</b> AAATTGACGAACTCAAGG <b>-----</b> |
|                                   | 925 930 940 950                                                |
|                                   | ... ... ... ... ... ...                                        |
| <i>Homo sapiens</i>               | CTGTGCCACA-----TAA                                             |
| <i>Bradypus variegatus</i>        | CTGTGCCACAGCTTCAGGAAAAGAATG <b>-TAA</b>                        |
| <i>Cyclopes didactylus</i>        | CTTTGCCACA <b>ACTTCAGGAAAAGGATG-TAA</b>                        |
| <i>Choloepus hoffmanni</i>        | CTGTGTCACAGCTTCAGGAAAAGAATGTTAA                                |
| <i>Mylodon darwinii</i>           | ????????????????????????????????                               |
| <i>Dasypus novemcinctus</i>       | CTGTGCTACA-----TAA                                             |
| <i>Procavia capensis</i>          | CTGTGCCACA-----TAA                                             |
| <i>Elephas maximus</i>            | CTGTACCACA-----TAA                                             |
| <i>Mammuthus primigenius</i>      | CTGTACCACA-----TAA                                             |
| <i>Loxodonta africana</i>         | CTGTACCACA-----TAA                                             |
| <i>Trichechus manatus</i>         | CTGTGCCACA-----TAA                                             |
| <i>Dugong dugon</i>               | CTGTGCCACA-----TAA                                             |
| <i>Hydrodamalis gigas</i>         | CTGTGCCACA-----TAA                                             |
| <i>Sus scrofa</i>                 | CTGTGCTGCA-----TAA                                             |
| <i>Sus verrucosus</i>             | CTGTGCTGCA-----TAA                                             |
| <i>Sus cebifrons</i>              | CTGTGCTGCA-----TAA                                             |
| <i>Physeter microcephalus</i>     | CTGTGCTACC-----TAA                                             |
| <i>Delphinapterus leucas</i>      | CTGTGCTACC-----TAA                                             |
| <i>Lipotes vexillifer</i>         | CTGTGCTACC-----TAA                                             |
| <i>Balaena mysticetus</i>         | CTGTGCTACC-----TAA                                             |
| <i>Balaenoptera acutorostrata</i> | CTGTGCTACC-----TAA                                             |
| <i>Balaenoptera physalus</i>      | CTGTGCTACC-----TAA                                             |
| <i>Balaenoptera bonaerensis</i>   | ????????????????????????????????                               |
| <i>Equus asinus</i>               | CTGTGCCACA-----TAA                                             |
| <i>Equus quagga boehmi</i>        | CTGTGCCACA-----TAA                                             |
| <i>Equus przewalskii</i>          | CTGTGCCACA-----TAA                                             |
| <i>Equus caballus</i>             | CTGTGCCACA-----TAA                                             |
| <i>Manis pentadactyla</i>         | CTGTGTCATA-----TAA                                             |

**fig. S2. Exon alignments depicting deleterious mutations found in *UCPI* sequences of placental mammal taxa.** The intact human *ucp1* sequence is provided for reference. Mutated initiation codons (green), premature stop codons (red), frameshift insertions (turquoise), deletions (dashes), frameshift deletions (pink), mutated splice sites (yellow), and mutated stop codons (teal) are indicated. Note insert from ~800 bp upstream of *ucp1* in exon 4 of beluga (grey). Missing data are denoted by question marks.

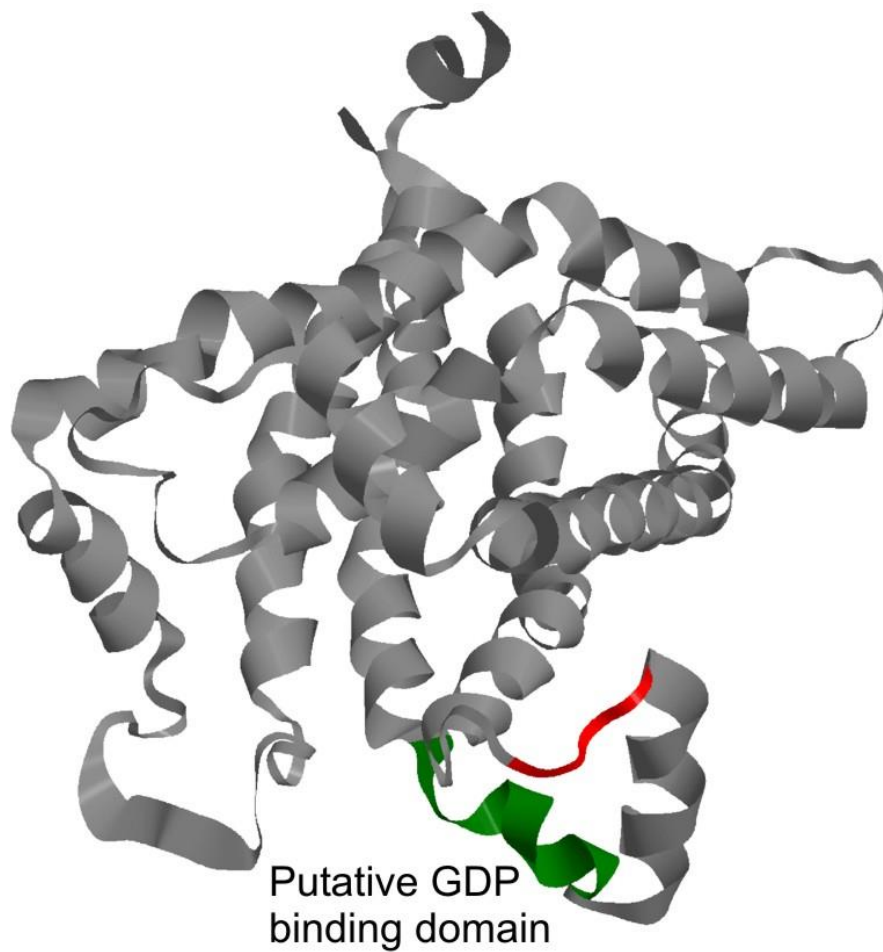

**fig. S3. Ribbon diagram of residues 13 to 304 of human UCP1 (UniProt accession number P25874) structurally modelled by SWISS-MODEL.** Residues highlighted in red denote the position of a four amino acid deletion in the third matrix loop of the camel (*Camelus ferus*) UCP1 protein which borders the putative GDP-binding domain (green).





|                                         |   |   |   |   |   |   |   |   |   |   |   |   |   |   |   |   |   |   |   |   |   |   |   |   |   |   |   |   |   |   |   |
|-----------------------------------------|---|---|---|---|---|---|---|---|---|---|---|---|---|---|---|---|---|---|---|---|---|---|---|---|---|---|---|---|---|---|---|
| <i>Saimiri boliviensis</i>              | M | E | T | N | T | R | E | L | F | L | N | F | T | I | V | L | I | T | V | I | L | M | W | L | L | V | R | S | Y | Q | Y |
| <i>Nomascus leucogenys</i>              | M | G | I | N | T | R | E | L | F | L | N | F | T | I | V | L | I | T | V | I | L | M | W | L | L | V | R | S | Y | Q | Y |
| <i>Colobus angolensis</i>               | M | G | I | N | T | R | E | L | F | L | N | F | T | I | V | L | I | T | V | I | L | M | W | L | L | V | R | S | Y | Q | Y |
| <i>Mandrillus leucophaeus</i>           | M | G | I | N | T | R | E | L | F | L | N | F | T | I | V | L | I | T | V | I | L | M | W | L | L | V | R | S | Y | Q | Y |
| <i>Cercocebus atys</i>                  | M | G | I | N | T | R | E | L | F | L | N | F | T | I | V | L | I | T | V | I | L | M | W | L | L | V | R | S | Y | Q | Y |
| <i>Pongo abelii</i>                     | M | G | I | N | T | R | E | L | F | L | N | F | T | I | V | L | I | T | V | I | L | M | W | L | L | V | R | S | Y | Q | Y |
| <i>Gorilla gorilla</i>                  | M | G | I | N | T | R | E | L | F | L | N | F | T | I | V | L | I | T | V | I | L | M | W | L | L | V | R | S | Y | Q | Y |
| <i>Homo sapiens</i>                     | M | G | I | N | T | R | E | L | F | L | N | F | T | I | V | L | I | T | V | I | L | M | W | L | L | V | R | S | Y | Q | Y |
| <i>Pan troglodytes</i>                  | M | G | I | N | T | R | E | L | F | L | N | F | T | I | V | L | I | T | V | I | L | M | W | L | L | V | R | S | Y | Q | Y |
| <i>Pan paniscus</i>                     | M | G | I | N | T | R | E | L | F | L | N | F | T | I | V | L | I | T | V | I | L | M | W | L | L | V | R | S | Y | Q | Y |
| <i>Nasalis larvatus</i>                 | M | G | I | N | T | R | E | L | F | L | N | F | T | I | V | L | I | T | V | I | L | M | W | L | L | V | R | S | Y | Q | Y |
| <i>Rhinopithecus roxellana</i>          | M | G | I | N | T | R | E | L | F | L | N | F | T | I | V | L | I | T | V | I | L | M | W | L | L | V | R | S | Y | Q | Y |
| <i>Chlorocebus sabaues</i>              | M | G | I | N | T | R | E | L | F | L | N | F | T | I | V | L | I | T | V | I | L | M | W | L | L | V | R | S | Y | Q | Y |
| <i>Macaca fascicularis</i>              | M | G | I | N | T | R | E | L | F | L | N | F | T | I | V | L | I | T | V | I | L | M | W | L | L | V | R | S | Y | Q | Y |
| <i>Macaca mulatta</i>                   | M | G | I | N | T | R | E | L | F | L | N | F | T | I | V | L | I | T | V | I | L | M | W | L | L | V | R | S | Y | Q | Y |
| <i>Macaca nemestrina</i>                | M | G | I | N | T | R | E | L | F | L | N | F | T | I | V | L | I | T | V | I | L | M | W | L | L | V | R | S | Y | Q | Y |
| <i>Papio anubis</i>                     | M | G | I | N | T | R | E | L | F | L | N | F | T | I | V | L | I | T | V | I | L | M | W | L | L | V | R | S | Y | Q | Y |
| <i>Condylura cristata</i>               | M | E | L | S | T | R | E | L | F | L | N | F | T | V | V | L | I | T | V | I | L | M | W | L | L | V | R | S | Y | Q | Y |
| <i>Erinaceus europaeus</i>              | M | E | R | S | T | R | E | L | F | L | N | F | T | V | V | L | I | T | V | I | L | M | W | L | L | V | R | S | Y | Q | Y |
| <i>Sorex araneus</i>                    | M | E | R | S | T | R | E | L | F | L | N | F | T | V | V | L | I | T | V | I | L | M | W | L | L | V | R | S | Y | Q | Y |
| <i>Eptesicus fuscus</i>                 | M | D | L | S | A | R | E | L | C | L | N | F | T | V | V | L | I | T | V | I | L | M | W | L | L | V | R | S | Y | Q | S |
| <i>Myotis lucifugus</i>                 | M | D | L | S | A | R | E | L | C | L | N | F | T | V | V | L | I | T | V | I | L | M | W | L | L | V | R | S | Y | Q | S |
| <i>Myotis brandtii</i>                  | M | D | L | S | A | R | E | L | C | L | N | F | T | V | V | L | I | T | V | I | L | M | W | L | L | V | R | S | Y | Q | S |
| <i>Myotis davidii</i>                   | M | D | L | S | A | R | E | L | C | L | N | F | T | V | V | L | I | T | V | I | L | M | W | L | L | V | R | S | Y | Q | S |
| <i>Rhinolophus ferrumequinum</i>        | M | E | H | S | T | R | E | L | C | L | N | F | T | I | V | L | I | T | V | I | L | M | W | L | L | V | R | S | Y | Q | S |
| <i>Megaderma lyra</i>                   | M | E | R | S | T | R | E | L | C | L | N | F | T | V | V | L | I | T | V | I | L | M | W | L | L | V | R | S | Y | Q | S |
| <i>Eidolon helvum</i>                   | M | E | L | S | T | R | E | L | C | L | N | F | T | V | V | L | I | T | V | I | L | M | W | L | L | V | R | S | Y | Q | Y |
| <i>Pteropus vampyrus</i>                | M | E | L | S | T | R | E | L | C | L | N | F | T | I | V | L | I | T | V | I | L | M | W | L | L | V | R | S | Y | Q | Y |
| <i>Pteropus alecto</i>                  | M | E | L | S | T | R | E | L | C | L | N | F | T | I | V | L | I | T | V | I | L | M | W | L | L | V | R | S | Y | Q | Y |
| <i>Manis pentadactyla</i>               | M | E | R | S | T | R | E | L | C | L | N | F | T | V | V | L | I | T | V | I | L | M | W | L | L | V | R | S | Y | Q | Y |
| <i>Felis catus</i>                      | M | G | I | S | T | R | E | L | F | L | N | F | T | I | V | L | I | T | V | I | L | M | W | L | L | V | R | S | Y | Q | Y |
| <i>Acinonyx jubatus</i>                 | M | G | I | S | T | R | E | L | F | L | N | F | T | I | V | L | I | T | V | I | L | M | W | L | L | V | R | S | Y | Q | Y |
| <i>Panthera uncia</i>                   | M | G | I | S | T | R | E | L | F | L | N | F | T | I | V | L | I | T | V | I | L | M | W | L | L | V | R | S | Y | Q | Y |
| <i>Panthera tigris</i>                  | M | G | I | S | T | R | E | L | F | L | N | F | T | I | V | L | I | T | V | I | L | M | W | L | L | V | R | S | Y | Q | Y |
| <i>Canis lupus</i>                      | M | G | I | S | T | R | E | L | F | L | N | F | T | I | V | L | I | T | V | I | L | M | W | L | L | V | R | S | Y | Q | Y |
| <i>Ursus maritimus</i>                  | M | G | I | S | T | R | E | L | F | L | N | F | T | I | V | L | I | T | V | I | L | M | W | L | L | V | R | S | Y | Q | Y |
| <i>Ailuropoda melanoleuca</i>           | M | G | I | S | T | R | E | L | F | L | N | F | T | I | V | L | I | T | V | I | L | M | W | L | L | V | R | S | Y | Q | Y |
| <i>Mustela putorius</i>                 | M | G | I | S | T | R | E | L | F | L | N | F | T | I | V | L | I | T | V | I | L | M | W | L | L | V | R | S | Y | Q | Y |
| <i>Odobenus rosmarus</i>                | M | G | I | S | T | R | E | L | F | L | N | F | T | I | V | L | I | T | V | I | L | M | W | L | L | V | R | S | Y | Q | Y |
| <i>Leptonychotes weddellii</i>          | M | G | I | S | T | R | E | L | F | L | N | F | T | I | V | L | I | T | V | I | L | M | W | L | L | V | R | S | Y | Q | Y |
| <i>Tapirus indicus</i>                  | M | E | W | T | T | R | E | L | F | L | N | F | T | V | V | L | I | T | V | I | L | M | W | L | L | V | R | S | Y | Q | Y |
| <i>Ceratotherium simum</i>              | M | E | W | T | T | R | E | L | F | L | N | F | T | V | V | L | I | T | V | I | L | M | W | L | L | V | R | S | Y | Q | Y |
| <i>Diceros bicornis</i>                 | M | E | W | T | T | R | E | L | F | L | N | F | T | V | V | L | I | T | V | I | L | M | W | L | L | V | R | S | Y | Q | ? |
| <i>Rhinoceros unicornis</i>             | M | E | W | T | T | R | E | L | F | L | N | F | T | V | V | L | I | T | V | I | L | M | W | L | L | V | R | S | Y | Q | Y |
| <i>Dicerorhinus sumatrensis</i>         | M | E | W | T | T | R | E | L | F | L | N | F | T | V | V | L | I | T | V | I | L | M | W | L | L | V | R | S | Y | Q | Y |
| <i>Coelodonta antiquitatis</i>          | M | E | W | T | T | R | E | L | F | L | N | F | T | V | V | L | I | T | V | I | L | M | W | L | L | V | R | S | Y | Q | Y |
| <i>Equus przewalskii</i>                | M | E | W | R | - | R | E | L | F | L | N | F | T | V | V | L | I | T | V | I | L | M | W | L | L | V | R | S | Y | Q | - |
| <i>Equus caballus</i>                   | M | E | W | R | - | R | E | L | F | L | N | F | T | V | V | L | I | T | V | I | L | M | W | L | L | V | R | S | Y | Q | - |
| <i>Equus asinus</i>                     | M | E | W | R | - | R | E | L | F | L | N | F | T | V | V | L | I | T | V | I | L | M | W | L | L | V | R | S | Y | Q | - |
| <i>Camelus ferus</i>                    | M | E | R | S | T | R | E | L | C | L | N | F | T | V | V | L | I | T | V | I | L | I | W | L | L | V | R | S | Y | Q | Y |
| <i>Vicugna pacos</i>                    | M | E | R | S | T | R | E | L | C | L | N | F | T | V | V | L | I | T | V | I | L | I | W | L | L | V | R | S | Y | Q | Y |
| <i>Sus scrofa</i>                       | M | E | R | S | T | R | E | L | C | L | N | F | T | V | V | L | I | T | V | I | L | I | W | L | L | V | R | S | Y | Q | Y |
| <i>Sus cebifrons</i>                    | M | E | R | S | T | R | E | L | C | L | N | F | T | V | V | L | I | T | V | I | L | I | W | L | L | V | R | S | Y | Q | Y |
| <i>Sus verrucosus</i>                   | M | E | R | S | T | R | E | L | C | L | N | F | T | V | V | L | I | T | V | I | L | I | W | L | L | V | R | S | Y | Q | Y |
| <i>Balaenoptera acutorostrata</i>       | M | E | R | S | T | R | E | L | C | L | N | F | T | V | V | L | I | T | V | I | L | I | W | L | L | V | R | S | Y | Q | Y |
| <i>Balaenoptera physalus</i>            | M | E | R | S | T | R | E | L | C | L | N | F | T | V | V | L | I | T | V | I | L | I | W | L | L | V | R | S | Y | Q | Y |
| <i>Balaenoptera bonaerensis</i>         | M | E | R | S | T | R | E | L | C | L | N | F | T | V | V | L | I | T | V | I | L | I | W | L | L | V | R | S | Y | Q | Y |
| <i>Physeter macrocephalus 1 &amp; 2</i> | M | E | R | S | T | R | E | L | C | L | N | F | T | V | V | L | I | T | V | I | L | I | W | L | L | V | R | S | Y | Q | Y |
| <i>Lipotes vexillifer</i>               | M | E | R | S | T | R | E | L | C | L | N | F | T | V | V | L | I | T | V | I | L | I | W | L | L | V | R | S | Y | Q | Y |
| <i>Orcinus orca</i>                     | M | E | R | S | T | R | E | L | C | L | N | F | T | V | V | L | I | T | V | I | L | I | W | L | L | V | R | S | Y | Q | Y |
| <i>Tursiops truncatus</i>               | M | E | R | S | T | R | E | L | C | L | N | F | T | V | V | L | I | T | V | I | L | I | W | L | L | V | R | S | Y | Q | Y |
| <i>Capreolus capreolus</i>              | M | E | R | S | T | R | E | L | C | L | N | F | T | V | V | L | I | T | V | I | L | I | W | L | L | V | R | S | Y | Q | Y |

|                             |   |   |   |   |   |   |   |   |   |   |   |   |   |   |   |   |   |   |   |   |   |   |   |   |   |   |   |   |   |   |   |
|-----------------------------|---|---|---|---|---|---|---|---|---|---|---|---|---|---|---|---|---|---|---|---|---|---|---|---|---|---|---|---|---|---|---|
| <i>Pantholops hodgsonii</i> | M | E | R | S | T | R | E | L | C | L | N | F | T | V | V | L | I | T | V | I | L | I | W | L | L | V | R | S | Y | Q | Y |
| <i>Ovis aries</i>           | M | E | R | S | A | R | E | I | C | L | N | F | T | V | V | L | I | T | V | M | L | I | W | L | L | V | R | S | Y | Q | Y |
| <i>Capra hircus</i>         | M | E | R | S | T | R | E | I | C | L | N | F | T | V | V | L | I | T | V | I | L | I | W | L | L | V | R | S | Y | Q | Y |
| <i>Capra aegagrus</i>       | M | E | R | S | T | R | E | I | C | L | N | F | T | V | V | L | I | T | V | I | L | I | W | L | L | V | R | S | Y | Q | Y |
| <i>Bubalus bubalis</i>      | M | E | R | S | T | R | E | L | C | L | N | F | T | V | V | L | I | T | V | I | L | I | W | L | L | V | R | S | Y | Q | Y |
| <i>Bison bison</i>          | M | E | R | S | T | R | E | L | C | L | N | F | T | V | V | L | I | T | V | I | L | I | W | L | L | V | R | S | Y | Q | Y |
| <i>Bos grunniens</i>        | M | E | R | S | T | R | E | L | C | L | N | F | T | V | V | L | I | T | V | I | L | I | W | L | L | V | R | S | Y | Q | Y |
| <i>Bos indicus</i>          | M | E | R | S | T | R | E | L | C | L | N | F | T | V | V | L | I | T | V | I | L | I | W | L | L | V | R | S | Y | Q | Y |
| <i>Bos taurus</i>           | M | E | R | S | T | R | E | L | C | L | N | F | T | V | V | L | I | T | V | I | L | I | W | L | L | V | R | S | Y | Q | Y |

**fig. S4. Amino acid alignment of vertebrate sln.** The mutated start codons (ATG→CTG) in the two-toed sloth (*Choleopus hoffmannii*) and brown-throated sloth (*Bradypus variegatus*) were verified from the NCBI sequence read archive and polymerase chain reaction amplification, respectively. Amino acid deletions in the equid lineage are highlighted in red. Note that two sarcolipin gene copies were found in the *Xenopus tropicalis*, *Monodelphis domestica*, and *Physeter macrocephalus* assemblies. Missing data denoted by question marks.

**table S1. GenBank accession numbers of species used in this study.**

| <i>Species name</i>              | <i>ucp1 Source</i>                                                                          | <i>ucp2 Source</i>                                                   | <i>ucp3 Source</i>                                                                          | <i>sln Source</i>                |
|----------------------------------|---------------------------------------------------------------------------------------------|----------------------------------------------------------------------|---------------------------------------------------------------------------------------------|----------------------------------|
| <b>Osteichthyes</b>              |                                                                                             |                                                                      |                                                                                             |                                  |
| <i>Astyanax mexicanus</i>        | APWO01100404.1<br>APWO01100403.1                                                            | APWO01075838.1                                                       | APWO01075838.1                                                                              | Missing                          |
| <i>Cyprinus carpio</i>           | AY461434.2                                                                                  | AJ243486.1                                                           | AY505343.1                                                                                  | Missing                          |
| <i>Danio rerio</i>               | CABZ01073633.1<br>CABZ01073634.1                                                            | CABZ01017713.1                                                       | CABZ01012840.1<br>CABZ01017713.1                                                            | NM_001302745.1                   |
| <i>Latimeria chalumnae</i>       | AFYH01226130.1<br>AFYH01226129.1                                                            | BAHO01089108.1<br>AFYH01155949.1                                     | Missing                                                                                     | AFYH01102483.1                   |
| <i>Lepisosteus oculatus</i>      | AHAT01015452.1                                                                              | AHAT01003069.1                                                       | AHAT01003069.1                                                                              | AHAT01003063.1                   |
| <i>Takifugu rubripes</i>         | CAAB02001533.1                                                                              | CAAB02000575.1                                                       | CAAB02000575.1                                                                              | CAAB02007733.1                   |
| <i>Xiphophorus maculatus</i>     | AGAJ01004818.1<br>AGAJ01004819.1                                                            | AGAJ01021216.1                                                       | AGAJ01021216.1                                                                              | AGAJ01040366.1                   |
| <b>Amphibia</b>                  |                                                                                             |                                                                      |                                                                                             |                                  |
| <i>Xenopus tropicalis</i>        | AAMC02004107.1                                                                              | NM_203848.1                                                          | NM_001095178.1                                                                              | AAMC02008311.1<br>AAMC02008313.1 |
| <b>Montremata</b>                |                                                                                             |                                                                      |                                                                                             |                                  |
| <i>Ornithorhynchus anatinus</i>  | NW_001794248.1                                                                              | AAPN01056149.1<br>AAPN01056148.1<br>AAPN01056147.1<br>AAPN01382618.1 | AAPN01178604.1<br>AAPN01178605.1                                                            | AAPN01035927.1                   |
| <b>Marsupialia</b>               |                                                                                             |                                                                      |                                                                                             |                                  |
| <i>Monodelphis domestica</i>     | AAFR03015618.1                                                                              | AAFR03050488.1                                                       | AAFR03050488.1                                                                              | AAFR03009954.1<br>AAFR03043596.1 |
| <i>Macropus eugenii</i>          | ABQO020217652.1<br>ABQO020162103.1<br>ABQO020106554.1<br>ABQO020051005.1<br>ABQO021106434.1 | ABQO020850797.1<br>ABQO020012246.1                                   | ABQO020339531.1<br>ABQO020395080.1<br>ABQO020450629.1<br>ABQO020707648.1<br>ABQO020652099.1 | ABQO020365261.1                  |
| <i>Sarcophilus harrisii</i>      | AEFK01228715.1<br>AEFK01215941.1                                                            | AFEY01422591.1                                                       | AFEY01409403.1<br>AFEY01344314.1<br>AFEY01422590.1                                          | AFEY01139015.1                   |
| <i>Sminthopsis crassicaudata</i> | EF622232.1                                                                                  | Missing                                                              | Missing                                                                                     | Missing                          |
| <b>Xenarthra</b>                 |                                                                                             |                                                                      |                                                                                             |                                  |
| <i>Choloepus hoffmanni</i>       | ABVD02364175.1                                                                              | ABVD01312484.1                                                       | ABVD02315747.1                                                                              | ABVD02284044.1                   |
| <i>Bradypus variegatus</i>       | KY886638                                                                                    | Missing                                                              | Missing                                                                                     | KY886670                         |
| <i>Cyclopes didactylus</i>       | KY886639                                                                                    | Missing                                                              | Missing                                                                                     | Missing                          |
| <i>Dasyurus novemcinctus</i>     | AAGV03181320.1                                                                              | AAGV03150769.1                                                       | AAGV03292997.1<br>AAGV03292996.1                                                            | AAGV03173212.1                   |
| <i>Myodon darwini</i>            | SRX327588                                                                                   | SRX327588<br>SRX327589                                               | SRX327588<br>SRX327589<br>SRX465052                                                         | SRX327588                        |

**Afrotheria**

|                                       |                                  |                        |                                   |                        |
|---------------------------------------|----------------------------------|------------------------|-----------------------------------|------------------------|
| <i>Chrysochloris asiatica</i>         | AMDV01244955.1<br>AMDV01244956.1 | AMDV01302651.1         | AMDV01302653.1                    | AMDV01027313.1         |
| <i>Dugong dugon</i>                   | KY886640                         | KY886652               | KY886661                          | KY886671               |
| <i>Echinops telfairi</i>              | AAIY02209271.1                   | AAIY02169770.1         | AAIY02169772.1                    | AAIY02172361.1         |
| <i>Elephantulus edwardii</i>          | AMGZ01097263.1                   | AMGZ01085574.1         | AMGZ01085576.1;<br>AMGZ01085575.1 | AMGZ01226582.1         |
| <i>Elephas maximus</i>                | KY886642                         | ERX334764<br>ERX334765 | ERX334764<br>ERX334765            | ERX334764<br>ERX334765 |
| <i>Hydrodamalis gigas</i>             | KY886641                         | KY886653               | KY886662                          | KY886672               |
| <i>Loxodonta africana</i>             | AAGU03034821.1                   | AAGU03079300.1         | AAGU03079300.1                    | AAGU03058675.1         |
| <i>Mammuthus primigenius</i>          | ERP008929                        | ERP008929              | ERP008929                         | ERP008929              |
| <i>Orycteropus afer</i>               | ALYB01104541.1<br>ALYB01104543.1 | ALYB01103367.1         | ALYB01103365.1                    | ALYB01161748.1         |
| <i>Procavia capensis</i>              | ABRQ02143236.1                   | ABRQ02011699.1         | ABRQ02011697.1                    | ABRQ02037372.1         |
| <i>Trichechus manatus latirostris</i> | AHIN01109623.1<br>AHIN01109624.1 | AHIN01084584.1         | AHIN01084587.1                    | AHIN01088368.1         |

**Laurasiatheria**

|                                   |                                                       |                                  |                                                    |                 |
|-----------------------------------|-------------------------------------------------------|----------------------------------|----------------------------------------------------|-----------------|
| <i>Acinonyx jubatus</i>           | LLWD01000416.1                                        | LLWD01000509.1                   | LLWD01000509.1                                     | LLWD01000070.1  |
| <i>Ailuropoda melanoleuca</i>     | ACTA01016457.1                                        | ACTA01146014.1                   | ACTA01130015.1                                     | ACTA01090054.1  |
| <i>Balaena mysticetus</i>         | KY886643                                              | Missing                          | Missing                                            | Missing         |
| <i>Balaenoptera acutorostrata</i> | ATDI01065547.1                                        | ATDI01094623.1                   | ATDI01094627.1                                     | ATDI01043778.1  |
| <i>Balaenoptera bonaerensis</i>   | BAUQ01197845.1<br>BAUQ01696173.1<br>BAUQ01341929.1    | BAUQ01410165.1                   | BAUQ01284797.1                                     | BAUQ01341977.1  |
| <i>Balaenoptera physalus</i>      | SRX323050                                             | SRX323050                        | SRX323050                                          | SRX323050       |
| <i>Bison bison</i>                | JPYT01100523.1                                        | JPYT01642782.1                   | JPYT01019071.1                                     | JPYT01254401.1  |
| <i>Bos grunniens</i>              | AGSK01075302.1                                        | AGSK01058532.1<br>[Misassembled] | AGSK01132661.1<br>AGSK01132663.1<br>[Misassembled] | AGSK01136949.1  |
| <i>Bos indicus</i>                | AGFL01142555.1<br>AGFL01142556.1                      | AGFL01131821.1                   | AGFL01131836.1<br>AGFL01131835.1                   | AGFL01128732.1  |
| <i>Bos taurus</i>                 | DAAA02044420.1<br>DAAA02044421.1                      | AAFC03092999.1                   | NM_174210.1                                        | AAFC03004956.1  |
| <i>Bubalus bubalis</i>            | AWWX01630119.1                                        | AWWX01596091.1                   | AWWX01532946.1                                     | AWWX01539210.1  |
| <i>Camelus ferus</i>              | AGVR01051296.1                                        | AGVR01023127.1                   | AGVR01023127.1                                     | AGVR01041834.1  |
| <i>Canis lupus familiaris</i>     | NM_001003046.1                                        | AAEX03012810.1                   | NM_001003047.1                                     | AOCS01147984.1  |
| <i>Capra aegagrus</i>             | CBYH010071014                                         | CBYH010041467.1                  | CBYH010041467.1                                    | JXYW01145092.1  |
| <i>Capra hircus</i>               | AJPT01162993.1                                        | JN986832.1                       | AJPT01151377.1                                     | AJPT01148506.1  |
| <i>Capreolus capreolus</i>        | CCMK010104759.1<br>CCMK012865005.1<br>CCMK010278719.1 | CCMK010138775.1                  | CCMK010008945.1                                    | CCMK010366203.1 |
| <i>Ceratotherium simum</i>        | AKZM01017598.1                                        | AKZM01032604.1                   | AKZM01032604.1                                     | AKZM01019766.1  |
| <i>Choeropsis liberiensis</i>     | KY886644                                              | KY886654                         | KY886663                                           | Missing         |
| <i>Coelodonta antiquitatis</i>    | KY886645                                              | KY886655                         | KY886664                                           | KY886673        |
| <i>Condylura cristata</i>         | AJFV01047153.1                                        | AJFV01042335.1                   | AJFV01042336.1                                     | AJFV01057960.1  |
| <i>Delphinapterus leucas</i>      | KY886646                                              | KY886656                         | KY886665                                           | Missing         |

|                                 |                                                        |                                     |                                                    |                                     |
|---------------------------------|--------------------------------------------------------|-------------------------------------|----------------------------------------------------|-------------------------------------|
| <i>Diceros bicornis</i>         | KY886647                                               | KY886657                            | KY886666                                           | KY886674                            |
| <i>Dicerorhinus sumatrensis</i> | KY886648                                               | KY886658                            | KY886667                                           | KY886675                            |
| <i>Eidolon helvum</i>           | AWHC01029981.1                                         | AWHC01218500.1                      | AWHC01218502.1<br>AWHC01218501.1                   | AWHC01196379.1                      |
| <i>Eptesicus fuscus</i>         | ALEH01005956.1                                         | ALEH01084492.1                      | ALEH01084495.1;<br>ALEH01084494.1                  | ALEH01120006.1                      |
| <i>Equus asinus</i>             | SRX290673<br>SRX290675<br>SRX290677                    | SRX290673<br>SRX290675<br>SRX290677 | SRX290673<br>SRX290675<br>SRX290677                | ERX607030<br>ERX607036<br>ERX607001 |
| <i>Equus caballus</i>           | AAWR02018851.1                                         | AAWR02018167.1                      | AAWR02018167.1                                     | AAWR02020714.1                      |
| <i>Equus przewalskii</i>        | ATBW01036321.1<br>ATBW01036320.1                       | ATBW01058700.1<br>ATBW01058701.1    | ATBW01058699.1                                     | ATBW01057363.1                      |
| <i>Equus quagga boehmi</i>      | KY886649                                               | Missing                             | Missing                                            | Missing                             |
| <i>Erinaceus europaeus</i>      | AMDU01193160.1<br>AMDU01193161.1<br>AMDU01193162.1     | AANN01307683.1                      | AMDU01063251.1<br>AMDU01063252.1<br>AMDU01063253.1 | AANN01527796.1                      |
| <i>Felis catus</i>              | ACBE01132808.1<br>ACBE01132809.1                       | AANG02100994.1                      | AANG02100994.1                                     | ACBE01332355.1                      |
| <i>Leptonychotes weddellii</i>  | APMU01141180.1<br>APMU01115166.1                       | APMU01037391.1                      | APMU01037393.1                                     | APMU01115847.1                      |
| <i>Lipotes vexillifer</i>       | AUPI01000024.1<br>AUPI01000025.1                       | AUPI01017650.1                      | AUPI01017651.1                                     | AUPI01060449.1                      |
| <i>Manis pentadactyla</i>       | JPTV01131901.1                                         | JPTV01099221.1                      | JPTV01146288.1                                     | JPTV01082441.1                      |
| <i>Megaderma lyra</i>           | AWHB01348443.1<br>AWHB01348444.1                       | AWHB01174334.1<br>AWHB01174333.1    | AWHB01278871.1<br>AWHB01278872.1                   | AWHB01215178.1                      |
| <i>Mustela putorius furo</i>    | AGTQ01041845.1                                         | AGTQ01009941.1                      | AGTQ01009939.1                                     | AEYP01061363.1                      |
| <i>Myotis brandtii</i>          | ANKR01273868.1<br>ANKR01273869.1                       | ANKR01210024.1                      | ANKR01210023.1                                     | ANKR01318413.1                      |
| <i>Myotis davidii</i>           | ALWT01125743.1                                         | ALWT01314732.1<br>ALWT01314733.1    | ALWT01314729.1                                     | ALWT01118440.1                      |
| <i>Myotis lucifugus</i>         | AAPE02001462.1                                         | AAPE02040816.1                      | AAPE02040815.1<br>AAPE02040816.1                   | AAPE02047638.1                      |
| <i>Neovison vison</i>           | EU360729.1                                             | EU360730.1                          | Missing                                            | Missing                             |
| <i>Odobenus rosmarus</i>        | ANOP01028105.1                                         | ANOP01000820.1                      | ANOP01000821.1                                     | ANOP01017035.1                      |
| <i>Orcinus orca</i>             | ANOL02004931.1<br>(Deleted gene -<br>Synteny analysis) | ANOL02054064.1                      | ANOL02054065.1                                     | ANOL02064465.1                      |
| <i>Ovis aries</i>               | JN604985.1                                             | CBYI010055183.1                     | CBYI010055184.1                                    | ACIV011354444.1                     |
| <i>Panthera tigris altaica</i>  | ATCQ01112915.1                                         | ATCQ01048793.1                      | ATCQ01048791.1                                     | ATCQ01029167.1                      |
| <i>Panthera uncia</i>           | SRX273036                                              | SRX273036                           | SRX273036                                          | SRX273036                           |
| <i>Pantholops hodgsonii</i>     | AGTT01188813.1                                         | AGTT01169141.1                      | AGTT01169136.1                                     | AGTT01037849.1                      |
| <i>Phoca vitulina</i>           | AB921529.1                                             | Missing                             | Missing                                            | Missing                             |
| <i>Physeter macrocephalus</i>   | AWZP01062081.1                                         | AWZP01062236.1                      | AWZP01062236.1                                     | AWZP01043685.1<br>AWZP01078901.1    |
| <i>Pteropus alecto</i>          | ALWS01011689.1                                         | ALWS01169197.1                      | ALWS01169198.1<br>ALWS01169197.1                   | ALWS01050977.1                      |
| <i>Pteropus vampyrus</i>        | ABRP02126915.1                                         | ABRP02138358.1                      | ABRP02138358.1                                     | ABRP02100214.1                      |
| <i>Rhinoceros unicornis</i>     | KY886650                                               | KY886659                            | KY886668                                           | KY886676                            |
| <i>Rhinolophus</i>              | AWHA01040305.1                                         | AWHA01096410.1                      | AWHA01092973.1                                     | AWHA01130749.1                      |

|                           |                                                        |                           |                                  |                           |
|---------------------------|--------------------------------------------------------|---------------------------|----------------------------------|---------------------------|
| <i>ferrumequinum</i>      | AWHA01040304.1                                         |                           | AWHA01092975.1                   |                           |
| <i>Sorex araneus</i>      | AALT02056093.1                                         | AALT02155451.1            | AALT02155448.1<br>AALT02155449.1 | AALT02042376.1            |
| <i>Suncus murinus</i>     | AB244816.1                                             | Missing                   | Missing                          | Missing                   |
| <i>Sus cebriifrons</i>    | ERX149172                                              | ERX149172                 | ERX149172                        | ERX149172                 |
| <i>Sus scrofa</i>         | DQ372918.1                                             | NM_214289.1               | NM_214049.1                      | AJJK01191606.1            |
| <i>Sus verrucosus</i>     | ERX1054048-<br>ERX1054067                              | ERX1054048-<br>ERX1054067 | ERX1054048-<br>ERX1054067        | ERX1054048-<br>ERX1054067 |
| <i>Tapirus indicus</i>    | KY886651                                               | KY886660                  | KY886669                         | KY886677                  |
| <i>Tursiops truncatus</i> | ABRN02199412.1<br>(Deleted gene -<br>Synteny analysis) | ABRN02011700.1            | ABRN02011697.1                   | ABRN02379235.1            |
| <i>Ursus maritimus</i>    | AVOR01014285.1                                         | AVOR01090225.1            | AVOR01090228.1                   | AVOR01032007.1            |
| <i>Vicugna pacos</i>      | ABRR02134987.1                                         | ABRR02047266.1            | ABRR02047266.1                   | ABRR02146164.1            |

### Euarchontoglires

|                                     |                                                                          |                                                                                             |                                                    |                 |
|-------------------------------------|--------------------------------------------------------------------------|---------------------------------------------------------------------------------------------|----------------------------------------------------|-----------------|
| <i>Aotus nancymae</i>               | JYKP01215429.1                                                           | JYKP01068224.1                                                                              | JYKP01068227.1                                     | JYKP01155709.1  |
| <i>Apodemus sylvaticus</i>          | LIPJ01014497.1<br>LIPJ01184746.1                                         | LIPJ01041350.1                                                                              | LIPJ01000433.1                                     | LIPJ01004285.1  |
| <i>Callithrix jacchus</i>           | ACFV01002817.1<br>ACFV01002818.1                                         | ACFV01035072.1                                                                              | ACFV01035065.1<br>ACFV01035066.1<br>ACFV01035067.1 | JRUL010233331.1 |
| <i>Cavia aperea</i>                 | AVPZ01000778.1                                                           | AVPZ01000005.1                                                                              | AVPZ01000005.1                                     | AVPZ01000041.1  |
| <i>Cavia porcellus</i>              | AAKN02011801.1                                                           | AAKN02051191.1                                                                              | AAKN02051190.1                                     | AAKN02053822.1  |
| <i>Cercocebus atys</i>              | JZLG01060688.1                                                           | JZLG01056565.1                                                                              | JZLG01056561.1                                     | JZLG01010897.1  |
| <i>Chinchilla lanigera</i>          | AGCD01027651.1<br>AGCD01027652.1                                         | AGCD01015245.1                                                                              | AGCD01015243.1                                     | AGCD01012756.1  |
| <i>Chlorocebus sabaeus</i>          | AQIB01017419.1                                                           | AQIB01134135.1                                                                              | AQIB01134133.1                                     | AQIB01093034.1  |
| <i>Colobus angolensis</i>           | JYKR01122839.1<br>JYKR01122838.1<br>JYKR01122837.1                       | JYKR01062401.1                                                                              | JYKR01062397.1                                     | JYKR01171003.1  |
| <i>Cricetulus griseus</i>           | AFTD01128394.1                                                           | AFTD01106142.1                                                                              | AFTD01106142.1                                     | APMK01041211.1  |
| <i>Daubentonia madagascariensis</i> | AGTM011584996.1<br>AGTM011708528.1<br>AGTM012010142.1<br>AGTM011594144.1 | AGTM010366851.1<br>AGTM012942927.1<br>AGTM010409851.1<br>AGTM011996042.1<br>AGTM011949823.1 | AGTM010372645.1<br>AGTM011680642.1                 | AGTM011625695.1 |
| <i>Dicrostonyx groenlandicus</i>    | AF515781.1                                                               | Missing                                                                                     | Missing                                            | Missing         |
| <i>Dipodomys ordii</i>              | ABRO02057411.1                                                           | ABRO02020382.1                                                                              | ABRO02020382.1                                     | ABRO02010842.1  |
| <i>Eulemur flavifrons</i>           | LGHW01000184.1                                                           | LGHW01005764.1                                                                              | LGHW01005764.1                                     | LGHW01001219.1  |
| <i>Eulemur macaco</i>               | LGHX01000184.1                                                           | LGHX01005675.1                                                                              | LGHX01005675.1                                     | LGHX01001209.1  |
| <i>Fukomys damarensis</i>           | AYUG01151055<br>AYUG01151056                                             | AYUG01134562.1<br>AYUG01134563.1                                                            | AYUG01134566.1<br>AYUG01134565.1                   | AYUG01150094.1  |
| <i>Galeopterus variegatus</i>       | JMZW01045216.1<br>JMZW01045217.1                                         | JMZW01159785.1<br>JMZW01159786.1                                                            | JMZW01159781.1                                     | JMZW01093471.1  |
| <i>Gorilla gorilla gorilla</i>      | NW_004002547.1                                                           | NW_004005093.1                                                                              | NW_004005093.1                                     | CABD030081410.1 |
| <i>Heterocephalus glaber</i>        | AFSB01162372.1                                                           | AFSB01032172.1                                                                              | AFSB01032171.1                                     | AFSB01080593.1  |
| <i>Homo sapiens</i>                 | NG_012139.1                                                              | U82819.1                                                                                    | U84763.1                                           | U96094.1        |

|                                      |                                                    |                                  |                                                                      |                |
|--------------------------------------|----------------------------------------------------|----------------------------------|----------------------------------------------------------------------|----------------|
| <i>Jaculus jaculus</i>               | AKZC01091543.1                                     | AKZC01100636.1<br>AKZC01100637.1 | AKZC01100628.1<br>AKZC01100629.1<br>AKZC01100630.1<br>AKZC01100632.1 | AKZC01057088.1 |
| <i>Macaca fascicularis</i>           | CAEC01514737.1                                     | AEHL01150243.1                   | AEHL01150254.1;<br>AEHL01150253.1                                    | CAEC01142624.1 |
| <i>Macaca mulatta</i>                | AANU01271750.1                                     | AANU01189618.1                   | AANU01189616.1                                                       | AEHK01077455.1 |
| <i>Macaca nemestrina</i>             | JZLF01028562.1                                     | JZLF01057018.1                   | JZLF01057022.1                                                       | JZLF01029339.1 |
| <i>Mandrillus leucophaeus</i>        | JYKQ01107155.1<br>JYKQ01107156.1                   | JYKQ01166891.1                   | JYKQ01166885.1                                                       | JYKQ01102438.1 |
| <i>Marmota marmota</i>               | CZRN01000015.1                                     | CZRN01000004.1                   | CZRN01000004.1                                                       | CZRN01000026.1 |
| <i>Mesocricetus auratus</i>          | NM_001281332.1                                     | APMT01084061.1                   | APMT01084061.1                                                       | APMT01047702.1 |
| <i>Microcebus murinus</i>            | ABDC01082367.1                                     | ABDC01179060.1                   | ABDC01179052.1<br>ABDC01179053.1                                     | ABDC02015405.1 |
| <i>Microtus agrestis</i>             | LIQJ01004042.1                                     | LIQJ01014426.1                   | LIQJ01014426.1                                                       | LIQJ01000448.1 |
| <i>Microtus ochrogaster</i>          | AHZW01157106.1                                     | AHZW01107615.1                   | AHZW01107615.1                                                       | AHZW01020748.1 |
| <i>Mus musculus</i>                  | CAAA01024310.1                                     | CAAA01006333.1                   | AAHY01064811.1                                                       | AAHY01078220.1 |
| <i>Myodes glareolus</i>              | LIPI01003929.1                                     | LIPI01011290.1                   | LIPI01011290.1                                                       | LIPI01022398.1 |
| <i>Nannospalax galili</i>            | AXCS01128925.1                                     | AXCS01188952.1                   | AXCS01188951.1                                                       | AXCS01045434.1 |
| <i>Nasalis larvatus</i>              | JMHX01319533.1                                     | JMHX01319543.1                   | CM003003.1                                                           | JMHX01319543.1 |
| <i>Nomascus leucogenys</i>           | ADFV01177960.1<br>ADFV01177959.1                   | ADFV01111583.1                   | ADFV01111578.1<br>ADFV01111580.1                                     | ADFV01056290.1 |
| <i>Ochotona dauurica</i>             | AB283043.1                                         | Missing                          | Missing                                                              | Missing        |
| <i>Ochotona princeps</i>             | ALIT01060999.1                                     | AAYZ01137505.1                   | AAYZ01237828.1                                                       | AAYZ01218708.1 |
| <i>Octodon degus</i>                 | AJSA01193670.1<br>AJSA01193671.1                   | AJSA01174660.1                   | AJSA01174659.1<br>AJSA01174660.1                                     | AJSA01031476.1 |
| <i>Oryctolagus cuniculus</i>         | NM_001171077.1                                     | AAGW02008192.1                   | AAGW02008192.1                                                       | AAGW02009195.1 |
| <i>Otolemur garnettii</i>            | AAQR03074138.1                                     | AAQR03001165.1                   | AAQR03001162.1                                                       | AAQR03181843.1 |
| <i>Pan paniscus</i>                  | AJFE01070904.1                                     |                                  | AJFE01047917.1                                                       | AJFE01100549.1 |
| <i>Pan troglodytes</i>               | AACZ03032212.1<br>AACZ03032211.1                   | AACZ03079660.1                   | AADA01222375.1                                                       | AADA01279835.1 |
| <i>Papio anubis</i>                  | AHZZ01043343.1                                     | AHZZ01024419.1                   | AHZZ01024424.1                                                       | AHZZ01040054.1 |
| <i>Papio hamadryas</i>               | PreEnsembl                                         | Missing                          | Missing                                                              | Missing        |
| <i>Peromyscus maniculatus</i>        | AYHN01134223.1<br>AYHN01134224.1                   | AYHN01057054.1                   | AYHN01057054.1                                                       | AYHN01010930.1 |
| <i>Phodopus sungorus</i>             | AF271263.1                                         | AF271264.1                       | AF271265.2                                                           | Missing        |
| <i>Pongo abelii</i>                  | ABGA01062109.1<br>ABGA01062111.1                   | ABGA01223176.1<br>ABGA01223175.1 | ABGA01223178.1                                                       | ABGA01383648.1 |
| <i>Propithecus coquereli</i>         | JZKE01017273.1<br>JZKE01017272.1<br>JZKE01017271.1 | JZKE01114303.1                   | JZKE01114303.1                                                       | JZKE01236593.1 |
| <i>Rattus norvegicus</i>             | AAHX01097782.1                                     | AAHX01007471.1                   | AABR06007535.1                                                       | AAHX01054738.1 |
| <i>Rhinopithecus roxellana</i>       | JABR01098768.1                                     | JABR01036514.1                   | JABR01036511.1                                                       | JABR01016757.1 |
| <i>Saimiri boliviensis</i>           | AGCE01051213.1                                     | AGCE01022106.1                   | AGCE01022109.1                                                       | AGCE01023439.1 |
| <i>Spermophilus tridecemlineatus</i> | AGTP01049379.1                                     | AAQQ01149310.1                   | AGTP01028875.1                                                       | AAQQ01672914.1 |
| <i>Tarsius syrichta</i>              | ABRT02355485.1<br>ABRT02355484.1                   | ABRT02455082.1                   | ABRT02455086.1<br>ABRT02455085.1                                     | ABRT02333009.1 |
| <i>Tupaia belangeri chinensis</i>    | ALAR01031044.1                                     | ALAR01010153.1                   | ALAR01010154.1                                                       | ALAR01067265.1 |

**table S2. Likelihood ratio tests for *ucp1* CODEML models.** The M2 pseudogene branch model was tested against individual branch models (M2), with additional branch categories for the camel, pygmy hippopotamus, stem rhinoceros, and stem pinniped branches. The pseudogene branch model (M2) analyses with and without the stem placental branch as its own category were tested against each other showing that  $\omega$  of the stem placental branch ( $\omega = 0.6333$ ) is significantly different than all placental branches with functional *ucp1* ( $\omega = 0.1591$ ). Branch categories for the pseudogene analysis included non-mammalian vertebrates, non-placental mammals, placental branches with intact *ucp1* loci, individual transitional branches (M2  $\omega$  values displayed in Fig. 3), and pseudogenic branches. Site and branch-site models were performed with pseudogenes pruned from the dataset. The site model M2a revealed no sites under positive selection and no difference from the null model M1a. The branch site model A was performed to identify sites on the stem placental branch that may have contributed to the gain of NST function. While eight sites were found to have a posterior probability  $>0.95$ , model A was not significantly different from the corresponding null model where  $\omega$  is fixed at 1 for foreground branch sites in the positive selection site category. Site and branch-site model parameters include the proportion of sites ( $p_0, p_1, p_2, p_{2a}$ , and  $p_{2a}$ ) and omega values ( $\omega_0, \omega_1, \omega_2, \omega_{2a}$  and  $\omega_{2b}$ ) for all site classes.

| LRT models                                     | Parameter estimates                                                                                                                                                                                                                                                                                                                                                                                                                                                                                                                   | $2\Delta l$ | df | p-value     | Sites (posterior probability $>0.95$ ) |
|------------------------------------------------|---------------------------------------------------------------------------------------------------------------------------------------------------------------------------------------------------------------------------------------------------------------------------------------------------------------------------------------------------------------------------------------------------------------------------------------------------------------------------------------------------------------------------------------|-------------|----|-------------|----------------------------------------|
| <b>Branch models</b>                           |                                                                                                                                                                                                                                                                                                                                                                                                                                                                                                                                       |             |    |             |                                        |
| <b>M2 pseudogene vs. M2 camel branch</b>       | <b>M2 pseudogene:</b><br>$\omega$ functional non-mammal branches = 0.0501<br>$\omega$ functional non-placental branches = 0.1238<br>$\omega$ functional placental branches = 0.1591<br>$\omega$ pseudogenic placental branches = 0.9443<br><b>M2 camel branch:</b><br>$\omega$ functional non-mammal branches = 0.0501<br>$\omega$ functional non-placental branches = 0.1238<br>$\omega$ functional placental branches = 0.1585<br>$\omega$ pseudogenic placental branches = 0.9438<br>$\omega$ <i>C. ferus</i> = 1.0330             | 4.66614     | 1  | 0.030762959 |                                        |
| <b>M2 pseudogene vs. M2 pygmy hippo branch</b> | <b>M2 pseudogene:</b><br>$\omega$ functional non-mammal branches = 0.0501<br>$\omega$ functional non-placental branches = 0.1238<br>$\omega$ functional placental branches = 0.1591<br>$\omega$ pseudogenic placental branches = 0.9443<br><b>M2 pygmy hippo branch:</b><br>$\omega$ functional non-mammal branches = 0.0501<br>$\omega$ functional non-placental branches = 0.1238<br>$\omega$ functional placental branches = 0.1585<br>$\omega$ pseudogenic placental branches = 0.9439<br>$\omega$ <i>C. liberiensis</i> = 0.2530 | 1.45469     | 1  | 0.227776571 |                                        |



|                                                    |                                                                                                                                                                                                                                                                                                                                                                                                                                                                                 |             |   |             |
|----------------------------------------------------|---------------------------------------------------------------------------------------------------------------------------------------------------------------------------------------------------------------------------------------------------------------------------------------------------------------------------------------------------------------------------------------------------------------------------------------------------------------------------------|-------------|---|-------------|
| <b>M2 pseudogene vs. M2 stem pinniped branch</b>   | <b>M2 pseudogene:</b><br>⊖ functional non-mammal branches = 0.0501<br>⊖ functional non-placental branches = 0.1238<br>⊖ functional placental branches = 0.1591<br>⊖ pseudogenetic placental branches = 0.9443<br><b>M2 pinniped branch:</b><br>⊖ functional non-mammal branches = 0.0501<br>⊖ functional non-placental branches = 0.1238<br>⊖ functional placental branches = 0.1580<br>⊖ pseudogenetic placental branches = 0.9439<br>⊖ stem pinniped branch = 0.2866          | 0.074304175 | 1 | 0.074304175 |
| <b>M2 pseudogene vs. M2 stem rhinoceros branch</b> | <b>M2 pseudogene:</b><br>⊖ functional non-mammal branches = 0.0501<br>⊖ functional non-placental branches = 0.1238<br>⊖ functional placental branches = 0.1591<br>⊖ pseudogenetic placental branches = 0.9443<br><b>M2 stem rhinoceros branch:</b><br>⊖ functional non-mammal branches = 0.0501<br>⊖ functional non-placental branches = 0.1238<br>⊖ functional placental branches = 0.1585<br>⊖ pseudogenetic placental branches = 0.9438<br>⊖ stem rhinoceros branch = 0.2851 | 1.459344    | 1 | 0.227034526 |
| <b>M2 pseudogene vs. M2 stem placental branch</b>  | <b>M2 pseudogene:</b><br>⊖ functional non-mammal branches = 0.0501<br>⊖ functional non-placental branches = 0.1238<br>⊖ functional placental branches = 0.1591<br>⊖ pseudogenetic placental branches = 0.9443<br><b>M2 stem placental branch:</b><br>⊖ functional non-mammal branches = 0.0502<br>⊖ functional non-placental branches = 0.1183<br>⊖ functional placental branches = 0.1536<br>⊖ pseudogenetic placental branches = 0.9437<br>⊖ stem placental branch = 0.6333   | 36.676754   | 1 | 1.39432E-9  |

#### Site models

|                    |                                                                                                                                                                                                                                                   |   |   |   |      |
|--------------------|---------------------------------------------------------------------------------------------------------------------------------------------------------------------------------------------------------------------------------------------------|---|---|---|------|
| <b>M1a vs. M2a</b> | <b>M1a:</b><br>$p_0 = 0.92037$<br>$p_1 = 0.07963$<br>$\omega_0 = 0.11041$<br>$\omega_1 = 1.00000$<br><b>M2a:</b><br>$p_0 = 0.92037$<br>$p_1 = 0.05616$<br>$p_2 = 0.02347$<br>$\omega_0 = 0.11038$<br>$\omega_1 = 1.00000$<br>$\omega_2 = 1.00004$ | 0 | 2 | 1 | None |
|--------------------|---------------------------------------------------------------------------------------------------------------------------------------------------------------------------------------------------------------------------------------------------|---|---|---|------|

#### Branch-site models

|                                                         |                                                                                                                                                                                                                                                                                                                                                                                                                                                                         |         |   |             |                                                                  |
|---------------------------------------------------------|-------------------------------------------------------------------------------------------------------------------------------------------------------------------------------------------------------------------------------------------------------------------------------------------------------------------------------------------------------------------------------------------------------------------------------------------------------------------------|---------|---|-------------|------------------------------------------------------------------|
| <b>Model A null vs. Model A - stem placental branch</b> | <b>Model A null:</b><br>$p_0 = 0.47004$<br>$p_1 = 0.04251$<br>$p_{2a} = 0.44702$<br>$p_{2b} = 0.04043$<br>$\omega_0$ & $\omega_{2a}$ background = 0.10531<br>$\omega_1$ & $\omega_{2b}$ background = 1.00000<br>$\omega_0$ foreground = 0.10531<br>$\omega_1, \omega_{2a}$ & $\omega_{2b}$ foreground = 1.00000<br><b>Model A:</b><br>$p_0 = 0.54398$<br>$p_1 = 0.04910$<br>$p_{2a} = 0.37323$<br>$p_{2b} = 0.03369$<br>$\omega_0$ & $\omega_{2a}$ background = 0.10532 | 0.63447 | 1 | 0.425720414 | 15L,<br>22S,<br>76K,<br>124L,<br>153I,<br>170T,<br>224I,<br>261M |
|---------------------------------------------------------|-------------------------------------------------------------------------------------------------------------------------------------------------------------------------------------------------------------------------------------------------------------------------------------------------------------------------------------------------------------------------------------------------------------------------------------------------------------------------|---------|---|-------------|------------------------------------------------------------------|

$\Omega_1$  &  $\Omega_{2b}$  background = 1.00000  
 $\Omega_0$  foreground = 0.10532  
 $\Omega_1$  foreground = 1.00000  
 $\Omega_{2a}$  &  $\Omega_{2b}$  foreground = 1.40522

**table S3. Calculated *ucp1* inactivation dates (Ma) within the placental mammal lineage.**

Inactivation date ranges were calculated using the two sets of formulas specified by Meredith *et al.* (26) with branch model CODEML analyses using species divergences and branch lengths arising from our 51 kb maximum likelihood species timetree analysis (data file S1). The first dating method assumes the rate of “synonymous substitution are neutral and equal on functional and pseudogene branches” while the second assumes “the rate synonymous substitution on functional branches is non-neutral and 70% of the rate of synonymous substitution on pseudogene branches”. Inactivation date calculations utilized  $\omega$  values for placental branches with functional *ucp1* ( $\omega=0.1591$ ), transitional branches ( $\omega$  values displayed in Fig. 3), and pseudogenetic branches ( $\omega=0.9435$ ). As  $\omega$  values calculated for *Dasypus novemcinctus*, *Manis pentadactyla*, and the stem cetacean branch ( $\omega=1.0567$ , 0.9849, and 0.9872, respectively) exceeded the mean value of pseudogenized branches, we placed their inactivation dates at the base of each clade. Conversely, the  $\omega$  value (0.0805) for the stem Pilosa branch was below that for functional branches; shared inactivating mutations in three-toed sloth (*Bradypus*), two-toed sloth (*Choleopus*), and silky anteater (*Cyclopes didactylus*), however, indicate *ucp1* was pseudogenized prior to their radiation ~55.03 Ma. Note that since only remnants of *ucp1* (exon 6) were identified from representative Pilosa, it is possible that *ucp1* pseudogenization preceded its divergence from Cingulata.

| Transitional branch         | Inactivation date (Ma) |
|-----------------------------|------------------------|
| <i>Dasypus novemcinctus</i> | 65.55                  |
| Pilosa                      | >55.03                 |
| <i>Procavia capensis</i>    | 33.5–27.3              |
| Proboscidea                 | 42.9–37.5              |
| Sirenia                     | 46.0–44.8              |
| Suidae ( <i>Sus spp.</i> )  | 41.2–36.4              |
| Cetacea                     | 52.75                  |
| Equus                       | 25.1–20.7              |
| <i>Manis pentadactyla</i>   | 74.69                  |

**table S4. Results of BiSSE models with and without constraints on the diversification rate for five trees from the work of Faurby and Svenning (56).**

| Tree # | Model                              | Constraints                           | lambda0   | lambda1   | mu0       | mu1       | q01       | q10 | parameters | Ln Lik | AIC   | p value  |
|--------|------------------------------------|---------------------------------------|-----------|-----------|-----------|-----------|-----------|-----|------------|--------|-------|----------|
| 1      | No reversal                        | q10 = 0                               | 0.2990537 | 0.2118425 | 0.2301557 | 0.1818380 | 0.0001916 | 0   | 5          | -14264 | 28539 | 2.32E-05 |
| 1      | No reversal, equal diversification | lambda0 = lambda1, mu0 = mu1, q10 = 0 | 0.2985928 | 0.2985928 | 0.2333964 | 0.2333964 | 0.0001907 | 0   | 3          | -14275 | 28556 |          |
| 2      | No reversal                        | q10 = 0                               | 0.2979023 | 0.1557338 | 0.2310627 | 0.1124779 | 0.0001479 | 0   | 5          | -14334 | 28679 | 1.31E-07 |
| 2      | No reversal, equal diversification | lambda0 = lambda1, mu0 = mu1, q10 = 0 | 0.292754  | 0.292754  | 0.228024  | 0.228024  | 0.0001891 | 0   | 3          | -14350 | 28707 |          |
| 3      | No reversal                        | q10 = 0                               | 0.2724713 | 0.1950414 | 0.1966417 | 0.1611570 | 0.0001922 | 0   | 5          | -14467 | 28944 | 1.27E-05 |
| 3      | No reversal, equal diversification | lambda0 = lambda1, mu0 = mu1, q10 = 0 | 0.2714773 | 0.2714773 | 0.1993568 | 0.1993568 | 0.0001890 | 0   | 3          | -14478 | 28963 |          |
| 4      | No reversal                        | q10 = 0                               | 0.3102003 | 0.1427713 | 0.2429003 | 0.0985164 | 0.0001410 | 0   | 5          | -14178 | 28366 | 9.45E-10 |
| 4      | No reversal, equal diversification | lambda0 = lambda1, mu0 = mu1, q10 = 0 | 0.3041617 | 0.3041617 | 0.2393333 | 0.2393333 | 0.0001951 | 0   | 3          | -14199 | 28404 |          |
| 5      | No reversal                        | q10 = 0                               | 0.2789428 | 0.1652951 | 0.2083545 | 0.1242601 | 0.0001596 | 0   | 5          | -14518 | 29047 | 3.37E-06 |
| 5      | No reversal, equal diversification | lambda0 = lambda1, mu0 = mu1, q10 = 0 | 0.2755167 | 0.2755167 | 0.2074114 | 0.2074114 | 0.0001844 | 0   | 3          | -14531 | 29068 |          |

**table S5. BiSSE results for neutral character simulations.** Neutral characters were simulated on the same five trees (5138 taxa) as in table S4. In each case, a model with no reversal ( $q_{10} = 0$ ) and no constraints on diversification rates was compared to a model with no reversal ( $q_{10} = 0$ ), equal speciation rates ( $\lambda_0 = \lambda_1$ ), and equal extinction rates ( $\mu_0 = \mu_1$ ). Significance levels are indicated (\* =  $p < 0.5$ ; \*\* =  $p < 0.01$ ; \*\*\* =  $p < 0.0001$ ).

| Tree # | Ln Lik | AIC   | ChiSq   | p value   | Significance level |
|--------|--------|-------|---------|-----------|--------------------|
| 1      | -14287 | 28580 | 8.3649  | 0.01526   | *                  |
| 1      | -14290 | 28585 | 17.882  | 0.0001309 | ***                |
| 1      | -14283 | 28571 | 25.832  | 2.46E-06  | ***                |
| 1      | -14268 | 28541 | 1.6061  | 0.448     |                    |
| 1      | -14297 | 28600 | 5.7015  | 0.0578    |                    |
| 1      | -14279 | 28564 | 2.7851  | 0.2484    |                    |
| 1      | -14268 | 28543 | 6.1693  | 0.04575   | *                  |
| 1      | -14279 | 28564 | 0.68013 | 0.7117    |                    |
| 1      | -14267 | 28539 | 1.6509  | 0.438     |                    |
| 1      | -14288 | 28582 | 2.1826  | 0.3358    |                    |
| 1      | -14262 | 28531 | 1.4547  | 0.4832    |                    |
| 1      | -14311 | 28628 | 0.24268 | 0.8857    |                    |
| 1      | -14268 | 28543 | 1.2025  | 0.5481    |                    |
| 1      | -14291 | 28588 | 15.569  | 0.0004162 | ***                |
| 1      | -14254 | 28514 | 4.3205  | 0.1153    |                    |
| 1      | -14268 | 28542 | 8.56    | 0.01384   | *                  |
| 1      | -14284 | 28574 | 5.711   | 0.05753   |                    |
| 1      | -14304 | 28615 | 4.7037  | 0.0952    |                    |
| 1      | -14276 | 28558 | 15.226  | 0.0004939 | ***                |
| 1      | -14301 | 28608 | 2.1298  | 0.3448    |                    |
| 2      | -14321 | 28648 | 2.2439  | 0.3256    |                    |
| 2      | -14352 | 28709 | 12.725  | 0.001725  | **                 |
| 2      | -14368 | 28742 | 1.9207  | 0.3828    |                    |
| 2      | -14360 | 28725 | 0.30942 | 0.8567    |                    |
| 2      | -14360 | 28726 | 2.7076  | 0.2583    |                    |
| 2      | -14342 | 28690 | 7.9521  | 0.01876   | *                  |
| 2      | -14332 | 28669 | 3.5106  | 0.1729    |                    |
| 2      | -14321 | 28648 | 2.2393  | 0.3264    |                    |
| 2      | -14356 | 28717 | 2.5266  | 0.2827    |                    |
| 2      | -14340 | 28686 | 1.5311  | 0.4651    |                    |
| 2      | -14340 | 28687 | 3.4521  | 0.178     |                    |
| 2      | -14347 | 28700 | 11.566  | 0.00308   | **                 |
| 2      | -14339 | 28685 | 7.5964  | 0.02241   | *                  |
| 2      | -14355 | 28715 | 12.958  | 0.001535  | **                 |
| 2      | -14348 | 28703 | 13.494  | 0.001174  | **                 |
| 2      | -14354 | 28714 | 3.9504  | 0.1387    |                    |

|   |        |       |         |           |     |
|---|--------|-------|---------|-----------|-----|
| 2 | -14349 | 28704 | 19.476  | 5.90E-05  | *** |
| 2 | -14360 | 28727 | 2.1532  | 0.3408    |     |
| 2 | -14348 | 28703 | 15.847  | 0.0003622 | *** |
| 2 | -14353 | 28713 | 0.42811 | 0.8073    |     |
| 3 | -14447 | 28899 | 24.473  | 4.85E-06  | *** |
| 3 | -14509 | 29024 | 4.2386  | 0.1201    |     |
| 3 | -14525 | 29056 | 16.217  | 0.0003009 | *** |
| 3 | -14488 | 28982 | 7.0465  | 0.0295    | *   |
| 3 | -14514 | 29034 | 7.2817  | 0.02623   | *   |
| 3 | -14494 | 28995 | 0.22603 | 0.8931    |     |
| 3 | -14470 | 28947 | 1.5699  | 0.4561    |     |
| 3 | -14498 | 29001 | 3.105   | 0.2117    |     |
| 3 | -14481 | 28967 | 7.1922  | 0.02743   | *   |
| 3 | -14472 | 28950 | 3.9134  | 0.1413    |     |
| 3 | -14477 | 28961 | 2.3794  | 0.3043    |     |
| 3 | -14472 | 28950 | 0.68295 | 0.7107    |     |
| 3 | -14455 | 28916 | 6.5718  | 0.03741   | *   |
| 3 | -14500 | 29007 | 17.326  | 0.0001729 | *** |
| 3 | -14477 | 28960 | 14.934  | 0.0005715 | *** |
| 3 | -14471 | 28947 | 13.084  | 0.001441  | **  |
| 3 | -14504 | 29014 | 3.9079  | 0.1417    |     |
| 3 | -14523 | 29051 | 7.2379  | 0.02681   | *   |
| 3 | -14476 | 28958 | 23.591  | 7.54E-06  | *** |
| 3 | -14501 | 29008 | 1.8208  | 0.4024    |     |
| 4 | -14178 | 28362 | 0.90767 | 0.6352    |     |
| 4 | -14220 | 28446 | 25.795  | 2.51E-06  | *** |
| 4 | -14212 | 28431 | 7.0962  | 0.02878   | *   |
| 4 | -14214 | 28433 | 18.623  | 9.04E-05  | *** |
| 4 | -14208 | 28423 | 0.68958 | 0.7084    |     |
| 4 | -14210 | 28426 | 22.513  | 1.29E-05  | *** |
| 4 | -14188 | 28382 | 1.5229  | 0.467     |     |
| 4 | -14215 | 28436 | 6.0754  | 0.04794   | *   |
| 4 | -14202 | 28410 | 4.4862  | 0.1061    |     |
| 4 | -14187 | 28380 | 1.037   | 0.5954    |     |
| 4 | -14200 | 28406 | 26.321  | 1.93E-06  | *** |
| 4 | -14187 | 28380 | 2.1832  | 0.3357    |     |
| 4 | -14176 | 28358 | 2.4273  | 0.2971    |     |
| 4 | -14187 | 28380 | 6.1279  | 0.0467    | *   |
| 4 | -14191 | 28388 | 8.889   | 0.01174   | *   |
| 4 | -14199 | 28403 | 9.5794  | 0.008315  | **  |
| 4 | -14188 | 28382 | 13.933  | 0.0009428 | *** |
| 4 | -14213 | 28432 | 20.863  | 2.95E-05  | *** |
| 4 | -14194 | 28393 | 4.8134  | 0.09011   |     |

|   |        |       |         |          |     |
|---|--------|-------|---------|----------|-----|
| 4 | -14200 | 28405 | 5.7027  | 0.05777  |     |
| 5 | -14527 | 29060 | 1.4141  | 0.4931   |     |
| 5 | -14546 | 29098 | 3.5835  | 0.1667   |     |
| 5 | -14536 | 29078 | 5.8842  | 0.05275  |     |
| 5 | -14549 | 29105 | 2.5866  | 0.2744   |     |
| 5 | -14525 | 29057 | 1.59    | 0.4516   |     |
| 5 | -14555 | 29116 | 107.64  | <2.2e-16 | *** |
| 5 | -14550 | 29106 | 0.29186 | 0.8642   |     |
| 5 | -14526 | 29058 | 4.8953  | 0.0865   |     |
| 5 | -14557 | 29119 | 2.5245  | 0.283    |     |
| 5 | -14530 | 29066 | 1.7002  | 0.4274   |     |
| 5 | -14546 | 29098 | 8.3536  | 0.01535  | *   |
| 5 | -14552 | 29109 | 4.0583  | 0.1314   |     |
| 5 | -14545 | 29096 | 4.2978  | 0.1166   |     |
| 5 | -14546 | 29098 | 3.0219  | 0.2207   |     |
| 5 | -14534 | 29074 | 10.38   | 0.005572 | **  |
| 5 | -14510 | 29025 | 9.9686  | 0.006845 | **  |
| 5 | -14570 | 29147 | 32.984  | 6.88E-08 | *** |
| 5 | -14562 | 29129 | 6.778   | 0.03374  | *   |
| 5 | -14545 | 29096 | 4.8771  | 0.08729  |     |
| 5 | -14526 | 29058 | 0.23807 | 0.8878   |     |

**table S6. Deleterious mutations found in *ucp2* and *ucp3* sequences of placental mammal taxa.** Base numbers correspond to position in multiple species alignments (data files S7 and S8). Note that the coding region of several *ucp2* and *ucp3* sequences in GenBank (*ucp2*: Tammar wallaby [ABQO020850797.1], orangutan [ABGA01223176.1, ABGA01223175.1], and thirteen-lined ground squirrel [AAQQ01149310.1]; *ucp3*: Northern white-cheeked gibbon [ADFV01111578.1]) showed signs of disruption (indels), though these were not present in the NCBI sequence read archive and thus likely represent assembly errors.

| <b>Gene</b> | <b>Species name</b>         | <b>Base number</b>           | <b>Inactivating mutation</b> |               |
|-------------|-----------------------------|------------------------------|------------------------------|---------------|
| <i>ucp2</i> | <i>Dasypus novemcinctus</i> | 1                            | Mutated initiation codon     |               |
|             |                             | 96                           | 1 bp deletion                |               |
|             |                             | 348-349                      | 2 bp deletion                |               |
|             |                             | 396-397                      | 2 bp deletion                |               |
|             |                             | 463                          | 1 bp deletion                |               |
|             |                             | 646-648                      | Nonsense mutation            |               |
|             |                             | 653-654                      | 2 bp deletion                |               |
|             |                             | 673                          | 1 bp deletion                |               |
|             |                             | 889                          | 1 bp deletion                |               |
|             |                             | 906                          | 1 bp deletion                |               |
|             |                             | 930                          | 1 bp deletion                |               |
| <i>ucp3</i> | <i>Dasypus novemcinctus</i> | 752                          | 1 bp deletion                |               |
|             |                             | <i>Oryctolagus cuniculus</i> | 54                           | 1 bp deletion |
|             |                             |                              | 78                           | 1 bp deletion |



**table S7. Specimen data and sources of tissue samples used for PCR amplification and DNA hybridization capture.**

| Common name           | Scientific name                 | Sample                                                                                                                                                                                                                                                                                                                                                                     | Provided by                                                                                                                               |
|-----------------------|---------------------------------|----------------------------------------------------------------------------------------------------------------------------------------------------------------------------------------------------------------------------------------------------------------------------------------------------------------------------------------------------------------------------|-------------------------------------------------------------------------------------------------------------------------------------------|
| <b>Xenarthra</b>      |                                 |                                                                                                                                                                                                                                                                                                                                                                            |                                                                                                                                           |
| Brown-throated sloth  | <i>Bradypus variegatus</i>      | Genomic DNA, previously extracted                                                                                                                                                                                                                                                                                                                                          | M. Springer, University of California, Riverside                                                                                          |
| Silky anteater        | <i>Cyclopes didactylus</i>      | Genomic DNA, previously extracted (46)                                                                                                                                                                                                                                                                                                                                     | M. Springer, University of California, Riverside                                                                                          |
| <b>Paenungulata</b>   |                                 |                                                                                                                                                                                                                                                                                                                                                                            |                                                                                                                                           |
| Dugong                | <i>Dugong dugon</i>             | Two genomic DNA samples, Female, Mabuiag Island, Torres Straits, Australia, previously extracted (69);<br>Sample codes: MD33 and MD118                                                                                                                                                                                                                                     | D. McDonald, James Cook University, Australia                                                                                             |
| Steller's sea cow     | <i>Hydrodamalis gigas</i>       | Three bone samples housed in the Zoological Institute of the Russian Academy of Sciences (St. Petersburg, Russian Federation), previously extracted (64, 70)<br>ZI 6852: Mandible collected from Bering Island, Komandorskii in 1884<br>ZI6853: Humerus, no collection information<br>ZI 17170: Scapula, no collection information                                         | R. MacPhee, American Museum of Natural History                                                                                            |
| Asian elephant        | <i>Elephas maximus</i>          | Genomic DNA, Male, previously extracted (69)                                                                                                                                                                                                                                                                                                                               | W. Korver, Bowmanville Zoo, Ontario, Canada                                                                                               |
| African elephant      | <i>Loxodonta africana</i>       | Genomic DNA, Female, previously extracted (69)                                                                                                                                                                                                                                                                                                                             | W. Korver, Bowmanville Zoo, Ontario, Canada                                                                                               |
| <b>Laurasiatheria</b> |                                 |                                                                                                                                                                                                                                                                                                                                                                            |                                                                                                                                           |
| Pygmy hippopotamus    | <i>Choeropsis liberiensis</i>   | Genomic DNA, previously extracted (79)                                                                                                                                                                                                                                                                                                                                     | New York Zoological Society                                                                                                               |
| Bowhead whale         | <i>Balaena mysticetus</i>       | Genomic DNA                                                                                                                                                                                                                                                                                                                                                                | SWFSC                                                                                                                                     |
| Beluga whale          | <i>Delphinapterus leucas</i>    | Genomic DNA, previously extracted (79)                                                                                                                                                                                                                                                                                                                                     | New York Zoological Society                                                                                                               |
| Grant's zebra         | <i>Equus quagga boehmi</i>      | Skeletal muscle from stillborn calf                                                                                                                                                                                                                                                                                                                                        | S. Petersen, Assiniboine Park Zoo, Manitoba, Canada                                                                                       |
| Malayan tapir         | <i>Tapirus indicus</i>          | Blood                                                                                                                                                                                                                                                                                                                                                                      | M. Bertelsen, Copenhagen Zoo, Frederiksberg, Denmark<br>T. Gilbert and E. Willerslev, University of Copenhagen                            |
| Woolly rhinoceros     | <i>Coelodonta antiquitatis</i>  | Permafrost preserved tooth and bone samples housed at the Centre for GeoGenetics at the Natural History museum of Denmark (Copenhagen, Denmark)<br>CGG_1_000024: Tooth, Bol'shoi Lyakhovsky Island, Novaya Sibir' Island, Siberia, Russia<br>CGG_1_000029: Bone, Badyarikha, Indigirka Lowland, Russia<br>CGG_1_000031: Bone, Khetachan Creek Mine, Kolyma Lowland, Russia | T. Gilbert and E. Willerslev, University of Copenhagen                                                                                    |
| Black rhinoceros      | <i>Diceros bicornis</i>         | Genomic DNA, previously extracted                                                                                                                                                                                                                                                                                                                                          | CRES                                                                                                                                      |
| Sumatran rhinoceros   | <i>Dicerorhinus sumatrensis</i> | Blood excised from a leech that fed on a Sumatran rhinoceros                                                                                                                                                                                                                                                                                                               | R. Havmøller, T. Gilbert, and E. Willerslev, University of Copenhagen<br>Leibniz-Institute for Zoo and Wildlife Research, Berlin, Germany |
| Indian rhinoceros     | <i>Rhinoceros unicornis</i>     | Genomic DNA, previously extracted                                                                                                                                                                                                                                                                                                                                          | CRES                                                                                                                                      |

table S8. Fossil constraints used in timetree analysis.<sup>A</sup>

| Constrained Clade                                            | Min Age | Max Age | Basis for Max Age | Oldest Fossil                                                               | Comments/References                                                                                                                                                                                                                                                                                                                                                                                                                                                                                                                                                                                                                                                                                                                                                                                                                                                                                                                                                                                                                                                                                                                                                                                                                                                                                                                                                |
|--------------------------------------------------------------|---------|---------|-------------------|-----------------------------------------------------------------------------|--------------------------------------------------------------------------------------------------------------------------------------------------------------------------------------------------------------------------------------------------------------------------------------------------------------------------------------------------------------------------------------------------------------------------------------------------------------------------------------------------------------------------------------------------------------------------------------------------------------------------------------------------------------------------------------------------------------------------------------------------------------------------------------------------------------------------------------------------------------------------------------------------------------------------------------------------------------------------------------------------------------------------------------------------------------------------------------------------------------------------------------------------------------------------------------------------------------------------------------------------------------------------------------------------------------------------------------------------------------------|
| 1. Metatheria                                                | 65.18   | 83.8    | SB                | <i>Peradectes</i> (Puercan);<br><i>Minoperadectes</i><br>(Early Wasatchian) | Horovitz <i>et al.</i> (81) reported Puercan <i>Peradectes</i> (age = 65.18 Ma) as the oldest crown metatherian and recovered this taxon as a stem didelphimorphian. Benton <i>et al.</i> (78) cited Horovitz <i>et al.</i> (81) in support of a younger age for Metatheria but failed to describe their rationale for excluding <i>Peradectes</i> from crown Metatheria.                                                                                                                                                                                                                                                                                                                                                                                                                                                                                                                                                                                                                                                                                                                                                                                                                                                                                                                                                                                          |
| 2. Xenarthra                                                 | 47.8    | 66.0    | PB                | <i>Riostegotherium</i>                                                      | <i>Riostegotherium</i> is from the Itaboraian (82). The Itaboraian was originally considered equivalent to the Selandian stage (83), but Woodburne <i>et al.</i> (84) suggested an early Eocene age (minimum = 47.8 Ma). The first outgroup to Xenarthra is Afrotheria, Boreoeutheria, or Epitheria, all of which have early Paleocene representatives.                                                                                                                                                                                                                                                                                                                                                                                                                                                                                                                                                                                                                                                                                                                                                                                                                                                                                                                                                                                                            |
| 3. Proboscidea<br>(= <i>Loxodonta</i> to<br><i>Elephas</i> ) | 6.8     | 11.62   | SB                | <i>Loxodonta</i>                                                            | Vignaud <i>et al.</i> (85) reported <i>Loxodonta</i> in their faunal list for a hominid locality in Chad. Vignaud <i>et al.</i> 's (85) locality was radiometrically dated by Lebatard <i>et al.</i> (86) to have an age between 6.8 and 7.2 Ma. The oldest <i>Elephas</i> lineage fossils have a minimum age of 5.332 Ma (87, 88).                                                                                                                                                                                                                                                                                                                                                                                                                                                                                                                                                                                                                                                                                                                                                                                                                                                                                                                                                                                                                                |
| 4. <i>Dugong</i> to<br><i>Hydrodamalis</i>                   | 28.1    | 38.0    | SB                | <i>Crenatosiren</i>                                                         | The minimum age is based on the inclusion of early Oligocene taxa ( <i>e.g.</i> , <i>Crenatosiren olseni</i> ) in crown Dugongidae (64, 89).                                                                                                                                                                                                                                                                                                                                                                                                                                                                                                                                                                                                                                                                                                                                                                                                                                                                                                                                                                                                                                                                                                                                                                                                                       |
| 5. Sirenia ( <i>Dugong</i><br>to <i>Trichechus</i> )         | 41.3    | 59.2    | SB                | <i>Eotheroides</i>                                                          | The minimum age is based on the inclusion of Lutetian age <i>Eotheroides aegyptiacum</i> in crown Sirenia (64, 89-91).                                                                                                                                                                                                                                                                                                                                                                                                                                                                                                                                                                                                                                                                                                                                                                                                                                                                                                                                                                                                                                                                                                                                                                                                                                             |
| 6. Tethytheria                                               | 59.2    | 72.3    | SB                | <i>Eritherium</i>                                                           | <i>Eritherium</i> is a stem proboscidean and is no younger than the late Selandian (92), which has a minimum age of 59.1 Ma.                                                                                                                                                                                                                                                                                                                                                                                                                                                                                                                                                                                                                                                                                                                                                                                                                                                                                                                                                                                                                                                                                                                                                                                                                                       |
| 7. Paenungulata                                              | 59.2    | 72.3    | SB                | <i>Eritherium</i>                                                           | <i>Eritherium</i> is a stem proboscidean and is no younger than the late Selandian (92), which has a minimum age of 59.1 Ma.                                                                                                                                                                                                                                                                                                                                                                                                                                                                                                                                                                                                                                                                                                                                                                                                                                                                                                                                                                                                                                                                                                                                                                                                                                       |
| 8. Chiroptera                                                | 47.8    | 66.0    |                   | <i>Dizzya</i>                                                               | <i>Dizzya</i> (Phyllitidae, Vespertilionoidea) is among the oldest crown chiropterans and is from the Ypresian (93). We used the top of the Ypresian as a minimum age for Yangochiroptera. Phillips (94) suggested a maximum age of 58.9 Ma for Chiroptera. The oldest bats (earliest Eocene, ~55 Ma) were already highly specialized fliers with fully developed wings (95, 96). Bats are one of the least common groups of mammals in the fossil record (93, 95, 97, 98), and in our view it is unnecessarily restrictive to enforce a maximum of 58.9 Ma on crown Chiroptera. Furthermore, molecular studies have rearranged the evolutionary tree for bats and recovered numerous higher-level clades that were previously unrecognized based on morphological data (97, 99, 100). The relationships of several early Eocene fossils ( <i>e.g.</i> , <i>Palaeochiropteryx</i> , <i>Archaeonycteris</i> , <i>Hassianonycteris</i> ), in turn, lack robust support, and their inclusion or exclusion from crown Chiroptera is sensitive to the enforcement of molecular scaffolds (96, 97, 101). Phylogenetic uncertainties, convergent evolution, and a depauperate fossil record conspire together to limit our understanding of the early evolutionary history of bats and caution against employing a maximum that is younger than the KPg boundary (66 Ma). |
| 9. Megadermatidae<br>to Rhinolophidae+<br>Hipposideridae     | 38.0    | 56      | SB                | <i>Hipposideros</i>                                                         | <i>Hipposideros</i> and <i>Rhinolophus</i> are both known from the Eocene of Europe (102). Eiting and Gunnell (93) indicate that <i>Hipposideros</i> first occurs in the Bartonian whereas <i>Rhinolophus</i> first occurs in the Priabonian.                                                                                                                                                                                                                                                                                                                                                                                                                                                                                                                                                                                                                                                                                                                                                                                                                                                                                                                                                                                                                                                                                                                      |
| 10. Caniformia<br>(=Canidae to<br>Arctoidea)                 | 38.0    | 56      | SB                | <i>Hesperocyon<br/>gregarius</i>                                            | <i>Hesperocyon gregarius</i> fossils are known from the Duchesnean (~Bartonian) land mammal age in the middle Eocene (103). <i>H. gregarius</i> is a stem canid (104).                                                                                                                                                                                                                                                                                                                                                                                                                                                                                                                                                                                                                                                                                                                                                                                                                                                                                                                                                                                                                                                                                                                                                                                             |
| 11. Ursidae to other<br>Arctoidea                            | 28.1    | 41.3    | SB                | <i>Cephalogale</i>                                                          | <i>Cephalogale</i> belongs to the ursid subfamily Hemicyoninae and has emerged as a stem ursid in phylogenetic analyses (105); also see                                                                                                                                                                                                                                                                                                                                                                                                                                                                                                                                                                                                                                                                                                                                                                                                                                                                                                                                                                                                                                                                                                                                                                                                                            |

|                                            |       |      |          |                                          |                                                                                                                                                                                                                                                                                                                                                                                                                                                                                                                                                                                                                                                                                                                |
|--------------------------------------------|-------|------|----------|------------------------------------------|----------------------------------------------------------------------------------------------------------------------------------------------------------------------------------------------------------------------------------------------------------------------------------------------------------------------------------------------------------------------------------------------------------------------------------------------------------------------------------------------------------------------------------------------------------------------------------------------------------------------------------------------------------------------------------------------------------------|
|                                            |       |      |          |                                          | Wang <i>et al.</i> (106). <i>Cephalogale</i> is known from the early Oligocene (107). We used the top of the early Oligocene as the minimum for Urside to other arctoids.                                                                                                                                                                                                                                                                                                                                                                                                                                                                                                                                      |
| 12. Musteloidea to Pinnipedia              | 23.03 | 38.0 | SB/PB/PU | <i>Promartes</i> ,<br><i>Enaliarctos</i> | <i>Mustelavus priscus</i> is first known from the latest Eocene (108). <i>M. priscus</i> is either a stem musteloid (106, 108, 109), and the oldest representative of the crown taxon that includes musteloids and pinnipeds, or a deeper lineage within Caniformes (110). Tomiya's analysis is at odds with molecular studies and recovered <i>Ursus</i> inside of crown Musteloidea. Nevertheless, given the uncertainty regarding <i>Mustelavus</i> based on Tomiya (110), we implemented a minimum of 23.03 Ma for the musteloid-pinniped split based on the oldest musteloid ( <i>Promartes</i> ) (105, 108) and oldest pinniped ( <i>Enaliarctos</i> ) (111), both of which are from the late Oligocene. |
| 13. Pinnipedia                             | 20.43 | 33.9 | SB       | <i>Desmatophoca brachycephala</i>        | <i>Desmatophoca brachycephala</i> is Aquitanian (20.43-23.03 Ma) in age (112). The oldest stem pinnipeds are Chattian (e.g., <i>E. tedfordi</i> ). SB yields an older maximum than PB.                                                                                                                                                                                                                                                                                                                                                                                                                                                                                                                         |
| 14. Carnivora                              | 38.0  | 66.0 | PU       | <i>Hesperocyon gregarius</i>             | <i>Hesperocyon gregarius</i> is a basal canid in constrained (113) and unconstrained (104, 113) analyses. Viverravids from the early Paleocene are probably stem carnivorans (113), but phylogenetic uncertainty allows for the possibility that they are stem feliforms (114-116). Benton <i>et al.</i> (78) also suggested a maximum of 66 Ma for Carnivora.                                                                                                                                                                                                                                                                                                                                                 |
| 15. Perissodactyla                         | 55.5  | 61.6 | SB       | <i>Hyracotherium</i>                     | <i>Hyracotherium</i> first appears in Wa-0 at the beginning of the Eocene (117) and is the oldest crown Perissodactyla.                                                                                                                                                                                                                                                                                                                                                                                                                                                                                                                                                                                        |
| 16. Erinaceidae to Soricidae               | 61.6  | 83.8 | SB       | <i>Adunator</i>                          | <i>Adunator</i> is the oldest erinaceomorph (118) and is known from the Torrejonian (contained within Danian). The minimum age is 61.6 Ma and the maximum is the base of the Campanian (83.6 +/-0.2 = 83.8 Ma) based on SB.                                                                                                                                                                                                                                                                                                                                                                                                                                                                                    |
| 17. Cetartiodactyla                        | 52.5  | 66.0 | PB/PU    | <i>Himalayacetus</i>                     | <i>Himalayacetus</i> is from shallow benthic zone SB8, which has a minimum age of 52.5 Ma within the Ypresian (53, 118). Mesonychids are a possible sister taxon to Cetartiodactyla, or may even be nested with Cetartiodactyla as the sister to Cetacea (119). The oldest mesonychids are early Paleocene in age and establish a maximum age for Cetartiodactyla.                                                                                                                                                                                                                                                                                                                                             |
| 18. Whippomorpha                           | 52.5  | 61.6 | SB       | <i>Himalayacetus</i>                     | <i>Himalayacetus</i> is from shallow benthic zone SB8, which has a minimum age of 52.5 Ma within the Ypresian (53, 118).                                                                                                                                                                                                                                                                                                                                                                                                                                                                                                                                                                                       |
| 19. Cetacea                                | 34.0  | 47.8 | SB       | <i>Llanocetus denticrenatus</i>          | <i>Llanocetus</i> is known from the La Meseta Formation of Seymour Island, Antarctica, and is latest Eocene in age (53, 120). <i>Llanocetus</i> is the oldest crown cetacean and a primitive stem mysticete. The oldest odontocetes are stem odontocetes from the Rupelian (early Oligocene) or more precisely from the late early Oligocene (53), although there are also older forms that have not been described. Uhen (53) doesn't provide ages.                                                                                                                                                                                                                                                           |
| 20. Mysticeti                              | 20.43 | 33.9 | SB       | <i>Morenocetus parvus</i>                | <i>Morenocetus parvus</i> is the oldest described species belonging to crown-group Mysticeti, and is from the Aquitanian (minimum age = 20.43 Ma) in the early Miocene of Patagonia (121). There is also an unnamed balaenid (~28 Ma) from the late Oligocene of New Zealand (Kokoamu Greensand) (122), but the phylogenetic position of this taxon is unclear and awaits phylogenetic analysis (J. Geisler, communication to J. Gatesy).                                                                                                                                                                                                                                                                      |
| 21. Bovinae to Antilopinae                 | 16    | 28.1 | SB       | <i>Pseudoeotragus</i>                    | <i>Pseudoeotragus</i> is a stem antelope and is known from the Burdigalian (78).                                                                                                                                                                                                                                                                                                                                                                                                                                                                                                                                                                                                                               |
| 22. Haplorrhini (=Tarsiidae to Anthroidea) | 38.0  | 59.2 | PU       | Numerous eosimiids                       | <i>Altialasius</i> is known from the late Paleocene and is a stem anthropoid in recent cladistic analyses (123, 124), although not in Bloch <i>et al.</i> (125). <i>Anthrasimias</i> (54-55 Ma, Sparnacian) (123, 126) is another putative stem anthropoid, although its anthropoid status has been questioned (124). <i>Algeripithecus</i> is younger (> 45 Ma) and has been referred to Anthroidea (127). However, recent discoveries of more complete specimens of <i>Algeripithecus</i> suggest that it is not anthropoid (128). Instead, it may belong to the Azibiidae, which are argued to be adapiforms, early euprimates, plesiadapiforms (possible stem                                              |

|                                   |        |      |       |                                                                                                        |                                                                                                                                                                                                                                                                                                                                                                                                                                                                                                                                                                                                                                                                                                                                                                                                                                                                                                                                                                                                                                                                                                         |
|-----------------------------------|--------|------|-------|--------------------------------------------------------------------------------------------------------|---------------------------------------------------------------------------------------------------------------------------------------------------------------------------------------------------------------------------------------------------------------------------------------------------------------------------------------------------------------------------------------------------------------------------------------------------------------------------------------------------------------------------------------------------------------------------------------------------------------------------------------------------------------------------------------------------------------------------------------------------------------------------------------------------------------------------------------------------------------------------------------------------------------------------------------------------------------------------------------------------------------------------------------------------------------------------------------------------------|
|                                   |        |      |       |                                                                                                        | primates), or even nonprimates (128). As many as 11 species and six genera of Asian eosimiids are known from the middle Eocene of Asia (128). The oldest tarsiid is <i>Tarsius eoceanus</i> (129, 130) from the middle Eocene of China (minimum age = 38.0 Ma). We used the top of the middle Eocene as a minimum for crown Haplorhini based on the occurrence of numerous eosimiids from the middle Eocene (128). The maximum age allows for the possibility that the late Paleocene <i>Altiatlasius</i> from Morocco is a stem anthropoid (128).                                                                                                                                                                                                                                                                                                                                                                                                                                                                                                                                                      |
| 23. Anthropeoidea                 | 28.1   | 56.0 | PU    | <i>Aegyptopithecus</i>                                                                                 | <i>Aegyptopithecus</i> (early Oligocene~Rupelian) is a stem catarrhine in Kay <i>et al.</i> 's (131) cladistic analyses with molecular scaffolds. The oldest stem platyrrhine is <i>Branisella</i> (131) from the late Oligocene of Bolivia (Salla Beds, Chron 8, age = 25.82-27.02 Ma) (124). Some authors have suggested that <i>Catopithecus browni</i> from the Priabonian is a stem catarrhine, but other authors ( <i>e.g.</i> , Williams <i>et al.</i> ; 128) have suggested a stem anthropoid position for this taxon. Seiffert <i>et al.</i> (127) recovered a polytomy with catarrhines, platyrrhines, Parapithecoidea, Proteopithecidae, and <i>Algeripithecus minutus</i> . The age of the latter taxon is Ypresian to basal Lutetian, which established a maximum of 56.0 Ma for the base of Anthropeoidea if we allow for phylogenetic uncertainty, <i>i.e.</i> , that <i>Algeripithecus</i> is either a crown anthropoid or one of the first two outgroups. In contrast, Tabuce <i>et al.</i> (132) place <i>Algeripithecus</i> as a stem strepsirrhine based on more complete material. |
| 24. Catarrhini                    | 20.55  | 38.0 | PB/PU | <i>Afropithecus</i>                                                                                    | <i>Afropithecus turkanensis</i> , previously <i>Morotopithecus bishop</i> (133), is dated at 20.6 +/- 0.05 = 20.55 Ma based on overlying lava (134) and is the oldest crown-group catarrhine. It is a stem hominoid (135) or even a crown hominoid (134). The oldest cercopithecoid is <i>Victoriapithecus</i> (136) at ~19 Ma. Oligopithecids (including <i>Catopithecus</i> ) are sometimes regarded as stem catarrhines ( <i>e.g.</i> , see review of alternate hypotheses in Seiffert and Simons; 137) where <i>Catopithecus</i> is sometimes part of second outgroup to crown catarrhines). The age of <i>Catopithecus</i> is 34.8-33.7 Ma (Chron C13r) based on Seiffert (138), which is mostly within the Priabonian. We used the base of the Priabonian (38.0 Ma) as the maximum age for the base of Catarrhini.                                                                                                                                                                                                                                                                                |
| 25. Hominoidea                    | 11.608 | 28.1 | SB    | <i>Sivapithecus</i>                                                                                    | <i>Sivapithecus</i> is the oldest crown hominoid in Finarelli and Clyde's (135) cladistic and stratocladistic analyses.                                                                                                                                                                                                                                                                                                                                                                                                                                                                                                                                                                                                                                                                                                                                                                                                                                                                                                                                                                                 |
| 26. Strepsirrhini                 | 38.0   | 56   | SB/PB | <i>Saharagalago</i>                                                                                    | <i>Saharagalago misrensis</i> is known from the Bartonian (139) and is assigned to Galagidae; <i>Karanisia</i> is as a crown lorissid in Seiffert <i>et al.</i> 's (139) analysis, although these authors also allow for the possibility that this taxon is a stem lorissid or stem lorissiform. These are the oldest crown strepsirrhines. Adapiforms are paraphyletic at the base of crown Strepsirrhini (see 140). The oldest adapiforms are early Eocene and establish a maximum age for Strepsirrhini.                                                                                                                                                                                                                                                                                                                                                                                                                                                                                                                                                                                             |
| 27. Chinchillidae to Octodontidae | 24.5   | 38.0 | SB/PB | <i>Sallamys</i> , <i>Xylechimys</i> , <i>Deseadomys</i>                                                | Molecular studies (141, 142) suggest that <i>Myocastor</i> , and possibly <i>Capromys</i> , are nested within Echimyidae. The fossil taxa <i>Sallamys</i> , <i>Xylechimys</i> , and <i>Deseadomys</i> (family Echimyidae) are all known from the Deseadean (143), which is mostly late Oligocene and has a minimum age of 24.5 Ma (144, 145). These fossils establish the minimum age for Echimyidae (inclusive of <i>Capromys</i> and <i>Myocastor</i> ). <i>Eosallamys</i> , <i>Eoespina</i> , <i>Eosachacui</i> , and <i>Eodelphomys</i> were assigned to Echimyidae and are known from the Santa Rosa Local Fauna of Peru (146, 147). The putative age of this fauna is late Eocene, but this age is based on stage of evolution arguments and remains to be firmly established using more rigorous stratigraphic methods. Hence, we incorporate this information into our maximum age but not our minimum age.                                                                                                                                                                                     |
| 28. Phiomorpha + Caviomorpha      | 40.94  | 56   | SB/PB | Stem caviomorphs in Antoine <i>et al.</i> (146) including <i>Cachiyacuy</i> and other stem Caviomorpha | This calibration was suggested by Phillips (94) based on fossils that were described by Antoine <i>et al.</i> (148) including <i>Cachiyacuy contamanensis</i> . We retained minimum and maximum ages suggested by Phillips (94). Hartenberger (149) contends that specimens of the early Eocene <i>Glibia</i> are instead the oldest representatives of                                                                                                                                                                                                                                                                                                                                                                                                                                                                                                                                                                                                                                                                                                                                                 |

|                                        |       |       |       |                                       |                                                                                                                                                                                                                                                                                                                                                                                                                                                                                                                                                                                                                                                                                                                                                                                                                                                                                                                                                                                                                                  |
|----------------------------------------|-------|-------|-------|---------------------------------------|----------------------------------------------------------------------------------------------------------------------------------------------------------------------------------------------------------------------------------------------------------------------------------------------------------------------------------------------------------------------------------------------------------------------------------------------------------------------------------------------------------------------------------------------------------------------------------------------------------------------------------------------------------------------------------------------------------------------------------------------------------------------------------------------------------------------------------------------------------------------------------------------------------------------------------------------------------------------------------------------------------------------------------|
|                                        |       |       |       |                                       | Phiomoridae. Given this possibility we used the base of the early Eocene as the maximum age for Phiomorpha to Caviomorpha.                                                                                                                                                                                                                                                                                                                                                                                                                                                                                                                                                                                                                                                                                                                                                                                                                                                                                                       |
| 29. Myomorpha (=Muroidea to Dipodidae) | 45    | 59.2  | SB    | <i>Pappocricetodon</i>                | Eocene deposits in China with <i>Pappocricetodon</i> have been biocorrelated with Bridgerian and early Uintan LMAs of North America (130), and suggest an age of ~45 Ma. SB yields a maximum age of 59.2 Ma for Muroidea + Dipodidae.                                                                                                                                                                                                                                                                                                                                                                                                                                                                                                                                                                                                                                                                                                                                                                                            |
| 30. <i>Mus</i> to <i>Rattus</i>        | 10.4  | 15.97 |       | <i>Karmimata</i>                      | <i>Karmimata darwini</i> is known from the Dhok Pathan Formation, which has an absolute age in the vicinity of 10.4 Ma (78) within the Tortonian stage. <i>K. darwini</i> is closer to <i>Rattus</i> than <i>Mus</i> (78). We used 10.4 Ma as the minimum age for <i>Rattus</i> to <i>Mus</i> following Benton <i>et al.</i> (78). Benton <i>et al.</i> (78) suggested a maximum constraint of 14.0 Ma based on the oldest record of <i>Antemurus</i> , which is found in the Langhian stage. We used the base of the Langhian stage (15.97 Ma) rather than 14.0 Ma for the maximum age of <i>Mus</i> to <i>Rattus</i> .                                                                                                                                                                                                                                                                                                                                                                                                         |
| 31. Rodentia                           | 56.0  | 66.0  | SB    | <i>Acritoparamys</i> , <i>Paramys</i> | The earliest crown rodents ( <i>e.g.</i> , <i>Acritoparamys</i> , <i>Paramys</i> ) are late Thanetian in age (78) and establish a minimum age of 56.0 Ma for Rodentia. Given this age, stratigraphic bounding supports a maximum age of 66.0 Ma, which agrees with Benton <i>et al.</i> (78).                                                                                                                                                                                                                                                                                                                                                                                                                                                                                                                                                                                                                                                                                                                                    |
| 32. Lagomorpha                         | 47.6  | 61.6  | SB/PB | Ypresian tarsals                      | Tarsals from the Vastan mine, India, belong to crown Lagomorpha in phylogenetic analyses (150; p. 1205). The age of the Vastan mine deposits is Ypresian (minimum = 47.6 Ma). The first and second outgroups to crown Lagomorpha are <i>Palaeolagus</i> and <i>Mimotona</i> (151, 152). The latter is from the late Paleocene, which includes the Selandian and Thanetian. <i>Dawsonolagus</i> (153) is another stem lagomorph, but has not been included in cladistic analyses.                                                                                                                                                                                                                                                                                                                                                                                                                                                                                                                                                 |
| 33. Mammalia                           | 160.7 | 227   | PB/PU | <i>Ambondro</i>                       | <i>Ambondro</i> , from the Bathonian, is a crown mammal in a variety of analyses ( <i>e.g.</i> , Lou <i>et al.</i> (154) and Woodburne <i>et al.</i> (155); reviewed in Benton <i>et al.</i> (78)), although its affinities with monotremes versus therians remain controversial. We followed Benton <i>et al.</i> (78) and used the top of the Bathonian, <i>i.e.</i> , 166.1 +/- 1.2 Ma = 164.9 Ma. Multituberculata are generally placed inside of crown Mammalia ( <i>e.g.</i> , Kielan-Jaworowska <i>et al.</i> ; 156). Haramiyids, in turn, may be related to multituberculates (156-158). The oldest haramiyid is <i>Thomasia</i> from the Norian (159). The oldest mammal fossils are <i>Adelobasileus</i> (159), <i>Gondwanadon</i> (160), and <i>Tikitherium</i> (160) from the Carnian, but there is no suggestion that any of these taxa belong to crown Mammalia. Given the uncertainty associated with the placement of Haramiyidae, including <i>Thomasia</i> , we employed a maximum of 227 Ma (base of Norian). |
| 34. Neognathae                         | 66    | 86.8  | SB    | <i>Vegavis iaai</i>                   | Clarke <i>et al.</i> (161); Benton <i>et al.</i> (78, 118)                                                                                                                                                                                                                                                                                                                                                                                                                                                                                                                                                                                                                                                                                                                                                                                                                                                                                                                                                                       |
| 35. Amniota                            | 318   | 332.9 | SB    | <i>Hylonomus lyelli</i>               | <i>Hylonomus</i> is from the Joggins Formation of Nova Scotia. The most recent estimates for the age of the Joggins Formation are in the range of 318-319 Ma (78) (based on Gradstein <i>et al.</i> ; 162). The maximum age is based on the absence of crown amniotes in well-sampled, fossiliferous deposits that occur below the strata with <i>Hylonomus</i> (78).                                                                                                                                                                                                                                                                                                                                                                                                                                                                                                                                                                                                                                                            |
| 36. Archosauria to Lepidosauria        | 255.9 | 295.9 | SB    | <i>Protorosaurus speneri</i>          | <i>Protorosaurus speneri</i> is the oldest archosauromorph and has a minimum age estimate of 255.9 Ma (78, 118), which falls within the Wuchiapingian stage of the Permian. Benton <i>et al.</i> (78) suggested a maximum age of 295.9 Ma.                                                                                                                                                                                                                                                                                                                                                                                                                                                                                                                                                                                                                                                                                                                                                                                       |
| 37. Tetrapoda                          | 337   | 351   | SB    | <i>Lethiscus stocki</i>               | <i>Lethiscus</i> is the oldest reptilomorph (stem amniote) and is from the Wardie Shales, which belong to the Lower Oil Shale Group. The age of the Wardie Shales is ~343.5-337 Ma (78) (based on Gradstein <i>et al.</i> ; 162). The maximum age for Tetrapoda is from Benton <i>et al.</i> (78).                                                                                                                                                                                                                                                                                                                                                                                                                                                                                                                                                                                                                                                                                                                               |

<sup>A</sup>Table modified and updated after Meredith *et al.* (46). Abbreviations: PB, phylogenetic bracketing; PU, phylogenetic uncertainty; SB, stratigraphic bounding; Ma, million years.
